# Supplementary material
Source: PubMed Central journal article supplement (PMC3769920)
Supplement: mmc1.pdf [file mmc1.pdf]

## **Supplemental Data**

### **Genome-wide Association Analysis of Blood-Pressure**

### **Traits in African-Ancestry Individuals Reveals Common**

### **Associated Genes in African and Non-African Populations**

Nora Franceschini, Ervin Fox, Zhaogong Zhang, Todd L. Edwards, Michael A. Nalls, Yun Ju Sung, Bamidele O. Tayo, Yan V. Sun, Omri Gottesman, Adebawole Adeyemo, Andrew D. Johnson, J. Hunter Young, Ken Rice, Qing Duan, Fang Chen, Yun Li, Hua Tang, Myriam Fornage, Keith L. Keene, Jeanette S. Andrews, Jennifer A. Smith, Jessica D. Faul, Zhang Guangfa, Wei Guo, Yu Liu, Sarah S. Murray, Solomon K. Musani, Sathanur Srinivasan, Digna R. Velez Edwards, Heming Wang, Lewis C. Becker, Pascal Bovet, Murielle Bochud Ulrich Broeckel, Michel Burnier, Cara Carty, Daniel I. Chasman, Georg Ehret, Wei-Min Chen, Guanjie Chen, Wei Chen, Jingzhong Ding, Albert W. Dreisbach, Michele K. Evans, Xiuqing Guo, Melissa E. Garcia, Rich Jensen, Margaux F. Keller, Guillaume Lettre, Vaneet Lotay, Lisa W. Martin, Jason H. Moore, Alanna C. Morrison, Thomas H. Mosley, Adesola Ogunniyi, Walter Palmas, George Papanicolaou, Alan Penman, Joseph F. Polak, Paul M. Ridker, Babatunde Salako, Andrew B. Singleton, Daniel Shriner, Kent D. Taylor, Ramachandran Vasani, Kerri Wiggins, Scott M. Williams, Lisa R. Yanek, Wei Zhao, Alan B. Zonderman, Diane M. Becker, Gerald Berenson, Eric Boerwinkle, Erwin Bottinger, Mary Cushman, Charles Eaton, Fredrik Nyberg, Gerardo Heiss, Joel N. Hirschhorn, Virginia J. Howard, Konrad J. Karczewski, Matthew B. Lanktree, Kiang Liu, Yongmei Liu, Ruth Loos, Karen Margolis, Michael Snyder, the Asian Genetic Epidemiology Network Consortium, Bruce M. Psaty, Nicholas J. Schork, David R. Weir, Charles N. Rotimi, Michele M. Sale, Tamara Harris, Sharon L.R. Kardia, Steven C. Hunt, Donna Arnett, Susan Redline, Richard S. Cooper, Neil J. Risch, D.C. Rao, Jerome I. Rotter, Aravinda Chakravarti, Alex P. Reiner, Daniel Levy, Brendan J. Keating, and Xiaofeng Zhu

#### AGEN Consortium Members

Min Jin Go, Young Jin Kim, Jong-Young Lee, Jae-Pil Jeon, Sung Soo Kim, Bok-Ghee Han, Yoon Shin Cho, Xueling Sim, Wan Ting Tay, Rick Tzee Hee Ong, Mark Seielstad, Jian Jun Liu, Tin Aung, Tien Yin Wong, Yik Ying Teo, E Shyong Tai, Chien-Hsiun Chen, Li-ching Chang, Yuan-Tsong Chen, Jer-Yuarn Wu, Tanika N. Kelly, Dongfeng Gu, James E. Hixson, Yun Ju Sung, Jiang He, Yasuharu Tabara, Yoshihiro Kokubo, Tetsuro Miki, Naoharu Iwai, Norihiro Kato, Fumihiko Takeuchi, Tomohiro Katsuya, Toru Nabika, Takao Sugiyama, Yi Zhang, Wei Huang, Xuegong Zhang, Xueya Zhou, Li Jin, Dingliang Zhu

## Study Description and Populations

### 1. Discovery COGENT BP studies

**BioVU:** BioVU is a DNA biorepository linked to a database of de-identified electronic medical records (EMR), designed and implemented to support genetic association studies at Vanderbilt University (VU). BioVU is an ongoing study with rapid accrual of DNA specimen, accumulating ~26,000 participants per year, and with a current size of over 130,000. Studies in BioVU have demonstrated the validity of EMR-based phenotypes<sup>1</sup>, clinical assessment of ancestry<sup>2</sup>, investigated pharmacogenetic traits<sup>3-5</sup>, and cardiovascular traits<sup>6-8</sup>. A detailed description of the human subjects protection applied to BioVU is described by Pulley *et al.* (2010)<sup>9</sup> The program is under continuous oversight by the institutional review board (IRB) and was reviewed in detail by the federal Office for Human Research Protections (OHRP). The BioVU DNA Repository is housed within the Center for Human Genetics Research DNA Resources Core (DNARC). Program planning for BioVU started in 2004, and sample accrual started in February 2007. Sample accrual is ongoing; there are over 126,676 DNA samples from adult clinic patients.

Traits are constructed for BioVU using the Synthetic Derivative (SD) database. This database is only accessible to Vanderbilt investigators and available by IRB approval. The SD database is a research tool developed to enable studies with de-identified clinical data. The SD collection includes information extracted from the EMR systems, and indexed by the same one-way Research Unique Identifier (RUI) used to track samples. The SD contains 1.7 million total records, with highly detailed longitudinal clinical data for approximately one million subjects. The database incorporates data from multiple sources and includes diagnostic and procedure codes (ICD 9 and CPT), basic demographics (age, gender, race), text from clinical care including discharge summaries, nursing notes, progress notes, history and physical, problem lists and multi-disciplinary assessments, laboratory values, echocardiogram (ECG) diagnoses, imaging reports, clinical text and electronically derived trace values, and inpatient medication orders.

For this blood pressure (BP) study, we used adult (age  $\geq 21$ ) African American BioVU participants with GWAS data. We used the first non-Emergency Department measured BP in the EMR, and excluded participants if there was a diagnosis of secondary hypertension (ICD-9 405), HIV infection (ICD-9 042), any cancer (ICD-9 140-239), end-stage renal disease (ICD-9 585.6), or heart failure (ICD-9 428) prior to, or on the date, of BP measurement. To define hypertension cases, participants' measured systolic BP (SBP) or diastolic BP (DBP)  $\geq 140$ mmHg or 90 mmHg respectively, have a diagnosis of hypertension (ICD-9 401-404), or a prescription for antihypertensive medication prior to, or on the date, of BP measurement (57.3% of eligible participants). For hypertension controls, participants' measured SBP and DBP  $\leq 125$  mmHg and 80 mmHg, and no prior diagnoses of hypertension, or prescriptions for antihypertensive medications.

**Bogalusa Heart Study:** The Bogalusa Heart Study is an epidemiologic survey of cardiovascular disease risk factors from birth through mid-adulthood. Participants (n = 1,420, ~40% male, ~70% European ancestry, 18–38 years of age) were previously examined as children in this long-term survey. Details of screening and examination procedures, followed in the Bogalusa Heart

Study since its inception, are reported elsewhere<sup>10 11</sup>. All data were collected after obtaining informed consent.

The BP levels were measured from the right arm of the subjects, with the subjects in a sitting position by two trained observers (three replicates each). The SBP and DBP were recorded at the first and fifth Korotkoff phases, respectively, using a mercury sphygmomanometer. The average of the six BP readings was used for this analysis.

**Candidate Gene Association Resource (CARE):** CARE samples were collected from five NHLBI-funded cohort studies where GWAS African American samples were available. (<http://public.nhlbi.nih.gov/GeneticsGenomics/home/care.aspx>).

**Atherosclerosis Risk Communities Study (ARIC):** The ARIC study is a population-based, biracial prospective cohort study of cardiovascular disease and its risk factors sponsored by National Heart, Lung and Blood Institute (NHLBI)<sup>12</sup>. ARIC included 15,792 European ancestry and African American individuals aged 45-64 years at baseline (1987-89), chosen by probability sampling from four US communities. Cohort members completed four clinic examinations, conducted three years apart between 1987 and 1998. Follow-up for clinical events was annual. The current analysis included only African American individuals with BP measures at baseline examination. The IRB at each of the study sites approved the study protocols, and written informed consent was obtained from all participants.

BP was measured using a standardized Hawksley random-zero mercury column sphygmomanometer with participants in a sitting position after a resting period of 5 minutes. The size of the cuff was chosen according to the arm circumference. Three sequential recordings for SBP and DBP were obtained; the mean of the last two measurements was used in this analysis, discarding the first reading. BP lowering medication use was recorded from the medication history. Outliers (>4 SDs from the mean) with respect to the SBP and DBP distribution were excluded from the analysis.

**The Coronary Artery Risk Development in Young Adults (CARDIA) Study:** The CARDIA study is a population based, prospective cohort examining the development and determinants of clinical and subclinical cardiovascular disease and its risk factors<sup>13</sup>. The CARDIA study initial enrollment consisted of 5,115 European Americans and African American men and women between 18 and 30 years old (52% African American and 55% women). The study is multicenter with recruitment in Birmingham, AL; Chicago, IL; Minneapolis, MN; and Oakland, CA. The IRB at each of the study sites approved the study protocols, and written informed consent was obtained from all participants. Baseline measurements were repeated, and additional measurements performed, at Years 2, 5, 7, 10, 15, and 20<sup>13</sup>. The current analysis included data measured at Year 15 (2000-2001) and only African American male and females.

Seated BP was measured on the right arm following 5 minutes rest using a random-zero sphygmomanometer. SBP and DBP were recorded as Phase I and Phase V Korotkoff sounds. Three measurements were taken at 1 minute intervals with the average of the second and third

measurements taken for the BP values. Hypertension was defined if SBP  $\geq$ 140 mmHg, DBP  $\geq$ 90 mmHg, or reported use of antihypertensive medication.

**The Cleveland Family Study (CFS):** CFS participants consist of first or selected second-degree relatives of a proband with either laboratory diagnosed obstructive sleep apnea or neighborhood control of an affected proband. Families were selected for genotyping on the basis of genetic informativeness, including multigenerational data or individuals from the extremes of the distribution of apnea phenotype<sup>14</sup>. These families include 59 African-American families with 176 individuals (100 females and 76 males) and 66 European-American families with 262 individuals (120 females and 142 males) with genotype and phenotype information. The IRB approved the study and written informed consent was obtained from all participants.

Participants had three supine BP measurements each performed after lying quietly for 10 minutes, before bed (10:00 P.M.) and upon awakening (7:00 A.M.), and another three sitting at 11 am, following standardized guidelines using a calibrated sphygmomanometer. Cuff size was determined by the circumference of the upper arm and the appropriate bladder size from a standard chart. BP phenotypes were determined from the average of the nine measurements.

**Jackson Heart Study (JHS):** JHS was initiated in 2000 to investigate prospectively the epidemiology and determinants of cardiovascular disease in African Americans<sup>15</sup>. JHS recruited 5,302 participants after completion of data adjustment, representing more than 5% of African Americans 35-84 years old living in the Jackson, Mississippi tri-county area. Of this number, ~30% were prior Jackson participants in the Atherosclerosis Risk in Communities Study. Of the remaining, 23% were recruited by random selection from a commercial listing that represents the overall tri-county population and an additional 23% volunteer sample, in which recruitment was distributed among defined demographic cells in proportions designed to mirror those in the overall population<sup>16</sup>. Those who were overlapping ARIC participants and those with previous MI were excluded from the GWAS. The IRB approved the study protocol, and written informed consent was obtained from all participants.

Seated BP was measured with a random-zero sphygmomanometer three times with the last two measurements averaged.

**The Multi-Ethnic Study of Atherosclerosis (MESA):** The MESA is a multicenter prospective cohort study initiated to study the development of subclinical cardiovascular disease. A total of 6,814 women and men between the age of 45 and 84 year were recruited for the first examination between 2000 and 2002. Participants were recruited in six US cities (Baltimore, MD; Chicago, IL; Forsyth County, NC; Los Angeles County, CA; Northern Manhattan, NY; and St. Paul, MN). Those with a history of CVD (defined as physician-diagnosed myocardial infarction, angina, heart failure, stroke, transient ischemic attack or history of invasive procedure for CVD) were excluded from participation. Thirty-eight % are of European ancestry, 28% African-American, 22% Hispanic, and 12% Asian, predominantly of Chinese descent. This study was approved by the IRB of each study site, and written informed consent was obtained from all

participants<sup>17</sup>. This manuscript utilizes data from African-American MESA participants, genotyped through the CARE project.

BP was measured three times at 1 minute intervals after a 5 minute initial rest using a Dinamap PRO 100 automated oscillometric device (Critikon, Tampa, FL) with the subject in seated, and the average of the second and third BP measurements was used in the analysis.

**Cardiovascular Health Study (CHS):** The CHS is a population-based cohort study of risk factors for CHD and stroke in adults  $\geq 65$  years conducted across four field centers<sup>18</sup>. The original cohort, predominantly Americans of European Ancestry, comprised 5,201 persons who were recruited in 1989-1990 from random samples of the Medicare eligibility lists. Additional 687 individuals, predominantly African-Americans, were enrolled subsequently for a total sample of 5,888. DNA was extracted from blood samples drawn on all participants at their baseline examination in 1989-90 (original cohort) or 1992-93 (African American cohort). A sample of 823 African-Americans satisfying study design criteria, and with genome-wide association data, were used for analysis.

Research staff with central training in BP measurement assessed repeated right-arm seated SBP and DBP levels at baseline with a Hawksley random-zero sphygmomanometer. The reported BP is the average of two measurements, which were taken after the participant had been sitting quietly for five minutes. First the technician determined the correct cuff size by measuring the arm circumference at the midpoint between the acromion and the olecranon. After applying the appropriate cuff, the maximum inflation level was determined by inflating the cuff until the radial pulse was no longer felt. The maximum inflation level was then determined to be the pulse obliteration pressure plus 30 mmHg plus the maximum zero level of the instrument. BP was measured by inflating the cuff to the maximum inflation level, waiting 5 seconds, then lowering by 2-3 mmHg per second. The first and fifth Korotkoff sounds were recorded. At least 30 seconds elapsed between each cuff inflation. Medication use was collected by interview. Information on prescription medication use in the previous two weeks was collected directly from the medications. A computer program developed by CHS was used to match the medication names with NDC numbers and then to group medications into analytic variables (e.g. beta blockers, lipid-lowering medications)<sup>19</sup>. Means of the repeated BP measurements from the baseline examination were used for the analyses.

**Genetic Study of Atherosclerosis Risk (GeneSTAR):** GeneSTAR is a 27 year prospective family-based study of incident CAD, diabetes, stroke, and other vascular diseases in initially healthy African American and European American adult relatives of probands with angiographically documented coronary disease prior to 60 years of age at the time of hospitalization for an acute CAD event in any of 10 Baltimore area hospitals<sup>20</sup>. The genotyped sample size is 3,200, with ~35 % African American (n= 1,132). Participants are siblings of the probands, offspring of the siblings and probands, and coparents of the offspring. All participants were under 60 years of age at the time of enrollment (from 1983 to 2006).

Demographic information, self-reported medical history, medication use, and smoking information were obtained from a standardized interview<sup>21</sup>. BP was measured using a standard mercury sphygmomanometer, following the American Heart Association<sup>22</sup> and JNC guidelines

<sup>23</sup>. The mean of three resting BP readings, taken early morning, midday, and late afternoon during the screening day was used to characterize BP measurements. Hypertension was defined as the subject having a mean SBP of  $\geq 140$  mmHg, a mean DBP of  $\geq 90$  mmHg, and/or currently taking an antihypertensive medication.

**The Genetic Epidemiology Network of Arteriopathy (GENOA):** GENOA is one of four networks in the Family Blood Pressure Program (FBPP) which recruited hypertensive African American and non-Hispanic white sibships for linkage and family-based association studies to investigate genetic contributions to BP in multiple racial groups <sup>24</sup>. Recruitment (Exam 1, 1995-2000 and Exam 2, 2000-2005) was population-based in two geographic locations: Jackson, Mississippi and Rochester, Minnesota. African Americans were recruited solely at the Jackson field center. Hypertensive probands were ascertained from the Jackson cohort of the ARIC study if they were in a sibship with two individuals with essential hypertension (SBP  $\geq 140$  mmHg or DBP  $\geq 90$  mmHg on the second and third clinic visit), diagnosed prior to age 60, and consented to participate. Index sib-pairs with possible secondary hypertension, including sib-pairs with previously diagnosed kidney disease (defined by serum creatinine level  $> 2$  mg/dL), were excluded. After quality control procedures, and exclusion of all overlapping participants with ARIC, genotype data from a total of 996 African Americans was available for this study.

SBP and DBPs were measured using an automated oscillometric BP measurement device with a consistent protocol across the FBPP networks. BP was measured three times on each participant by trained and certified technicians and then averaged for use in this analysis.

**The Healthy Aging in Neighborhoods of Diversity across the Life Span study (HANDLS):** The Healthy Aging in Neighborhoods of Diversity across the Life Span study (HANDLS) is an interdisciplinary, community-based, prospective longitudinal epidemiologic study examining the influences of race and socioeconomic status (SES) on the development of age-related health disparities among socioeconomically diverse African Americans and European ancestry individuals in Baltimore, Maryland, USA <sup>25</sup>. The HANDLS design is an area probability sample of Baltimore based on the 2000 Census. The study protocol facilitated our ability to recruit 3,722 participants from Baltimore. Among those who completed their examinations, there were no age differences associated with sex and poverty status, but African Americans were negligibly younger than individuals of European descent. The study is currently conducting wave three designed as a re-examination wave of all participants seen between 2004-2009. This wave began in July of 2009 and will conclude in 2012. Genotyping was focused on a subset of participants self-reporting as African American was undertaken at the Laboratory of Neurogenetics, National Institute on Aging, National Institutes of Health.

BP was measured using a non-invasively using the brachial artery auscultation method with an aneroid manometer, a stethoscope, and an inflatable cuff in individuals resting for 5 minutes. The average of right and left sitting BP values was taken to represent each of SBP and DBP, respectively for analyses.

**The Health, Aging and Body Composition (Health ABC) study:** HealthABC is a prospective cohort study of 3,075 community-dwelling men and women of African American and American European ancestry living in Memphis, Tennessee, USA and Pittsburgh, Pennsylvania, USA, aged 70–79 years at recruitment in 1997<sup>26</sup>. To identify potential participants, a random sample of European ancestry and African American Medicare-eligible elders, within designated zip code areas, were contacted. To be eligible, participants had to report no difficulty with activities of daily living, walking a quarter of a mile, or climbing ten steps without resting. They also had to be free of life-threatening cancer diagnoses and have no plans to move out of the study area for at least three years. The sample was approximately balanced for sex (51% women) and 42% of participants were African American. Participants self-designated race/ethnicity from a fixed set of options (Asian/Pacific Islander, black/African American, white/Caucasian, Latino/Hispanic, do not know, other). The study was designed to have sufficient numbers of African Americans to allow separate estimates of the relationship of body composition to functional decline. All eligible participants signed a written informed consent, approved by the IRBs at the clinical sites. This study was approved by the IRBs of the clinical sites and the coordinating center (University of California, San Francisco).

The baseline clinic visit included a drug inventory to assess pharmacological treatment, evaluation of body composition using dual energy x-ray absorptiometry (DEXA), BP measurements, electrocardiogram, physical performance tests, and strength measures. BP was calculated as the average of two seated measurements.

**The Hypertension Genetic Epidemiology Network (HyperGEN):** HyperGEN is a multicenter family-based study to research the genetic causes of hypertension and related conditions<sup>27</sup>. HyperGEN recruited African American and Caucasian participants at five field centers, with recruitment based largely on ongoing population-based studies. Study participants were recruited as one of three main types of subjects: 1) as part of a hypertensive sibship with at least two siblings diagnosed with hypertension; 2) random subjects, who were age-matched with hypertensive sibs; or 3) unmedicated adult offspring of one or more of the hypertensive siblings. Subjects were brought into the clinic for a one day exam, and data were collected from questionnaires, a physical exam, and blood and urine samples. This study obtained informed consent from participants and approval from the appropriate IRBs.

SBP and DBPs were measured using an automated oscillometric BP measurement device with a consistent protocol across the FBPP networks. BP was measured three times on each participant by trained and certified technicians and then averaged for use in this analysis.

**Loyola-Maywood study:** Participants were self-identified African Americans from a working class suburb of Chicago, Illinois, USA who were enrolled in studies of BP at the Loyola University Medical Center in Maywood, Illinois, USA as part of the International Collaborative Study on Hypertension in Blacks (ICSHIB) which is described in detail elsewhere<sup>28</sup>. Briefly, nuclear families were identified through middle-aged probands who were not ascertained based on any phenotype. Thereafter all available first-degree relatives 18 years old and above were enrolled into the study cohort of families. A screening exam was completed by trained and certified

research staff using a standardized protocol<sup>28; 29</sup>. Information was obtained on medical history, age, body weight and height. Protocols were reviewed and approved by the IRB at the Loyola University Chicago Stritch School of Medicine prior to recruitment activities. This present study included unrelated adults sampled and for whom information on anthropometrics, BP and use of antihypertensive medication was available.

BP measurements were obtained using an oscillometric device, previously evaluated in our field settings<sup>29</sup>. Three measurements were taken three minutes apart and the average of the final two was used in the analysis. Individuals with SBP  $\geq 140$  mmHg, DBP  $\geq 90$  mmHg or on anti-hypertensive medication at time of exam were defined as hypertensive. Participants with hypertension were offered treatment after detection at the screening exam.

**Loyola-Nigeria study:** The sampling frame for the Nigeria cohort was also provided by the (International Collaborative Study on Hypertension in Blacks) ICSHIB. Study participants were recruited from Igbo-Ora and Ibadan in southwest Nigeria as part of a long-term study on the environmental and genetic factors underlying hypertension<sup>30</sup>. The base cohort consists of over 15,000 participants with information available on anthropometrics, BP and use of antihypertensive medication. BP measurements followed the same protocol described in the Loyola-Maywood study. This present study included unrelated adults samples from the cohort and some hypertensive participants who were recruited as controls in the Africa-America Diabetes Mellitus (AADM) Study recruited from Ibadan in similar neighborhoods. Both projects were reviewed and approved by the sponsoring US institutions (Loyola University Chicago and Howard University) and the University of Ibadan. All participants signed informed consent administered in either English or Yoruba. Protocols for BP measurement are described under the Loyola-Maywood study.

**Mount Sinai IPM Biobank Program:** The Charles Bronfman Institute for Personalized Medicine (IPM) Biobank Program is a consented, Electronic Medical Record (EMR)-linked medical care setting biorepository of the Mount Sinai Medical Center (MSMC), drawing from a population of over 70,000 inpatients and 800,000 outpatient visits annually. The study design is described in detail elsewhere<sup>31</sup>. MSMC serves the diverse local communities of upper Manhattan, including Central Harlem (86% African American), East Harlem (88% Hispanic Latino), and Upper East Side (88% Americans of European ancestry) with broad health disparities. IPM Biobank populations include 28% African American, 38% Hispanic Latino predominantly of Caribbean origin, 23% of European ancestry. IPM Biobank disease burden is reflective of health disparities with broad public health impact. Since 2007, over 21,000 Mount Sinai patients have enrolled in the IPM Biobank program. Biobank operations are fully integrated in clinical care processes, including direct recruitment from clinical sites waiting areas and phlebotomy stations by dedicated Biobank recruiters independent of clinical care providers, prior to or following a clinician standard of care visit. Recruitment currently occurs at a broad spectrum of over 30 clinical care sites. This present study included only unrelated, adult, self-reported African Americans.

Information on anthropometrics, demographics, BP and use of antihypertensive medication was derived from participants EMR. The Mount Sinai Biobank Project (IRB # 07-0529 0001 02



ME) operates under an IRB-approved research protocol with IRB-approved informed consent forms. All study participants provided written informed consent. The Mount Sinai IPM Biobank Program is supported by The Andrea and Charles Bronfman Philanthropies.

**SIGNET/ Reasons for Geographic and Racial Differences in Stroke (REGARDS):** The Reasons for Geographic and Racial Differences in Stroke (REGARDS) Study is a national, population-based, longitudinal study of ~30,000 adult individuals of African American or European descent. Participants were randomly sampled with recruitment by mail then telephone. Individuals aged 45 years old and older were eligible for inclusion in the REGARDS cohort, for which enrollment began in February 2003. Exclusion criteria for REGARDS participation included active treatment for cancer; any serious medical condition which would prevent long-term participation; cognitive impairment as judged by the interviewer; living in a nursing home or on the waiting list for a nursing home; and a language barrier (speaks other than English). Samples from 2,398 SIGNET individuals with measures of BP and with GWAS data respectively were available for this study.

SBP and DBP were defined as the average of two measurements taken by a trained technician using a standard protocol and regularly tested aneroid sphygmomanometer (American Diagnostic Corporation, Hauppauge, NY), measured after the participant was seated for 5 minutes<sup>32</sup>. Briefly, BPs measurements were taken in the left arm (when possible) and a large size cuff was used if the arm circumference was greater than 13 inches. Both the cuff bladder width and pulse obliteration level were recorded. The cuff was inflated to 20 mmHg above the pulse obliteration level and slowly deflated (~ 2 mmHg/second) to obtain the BPs. This process was repeated to obtain the second BP on the same arm.

**Women's Health Initiative SNP Health Association Resource (WHI-SHARe):** Women's Health Initiative (WHI) is a long-term national health study that focuses on strategies for preventing common diseases such as heart disease, cancer and fracture in postmenopausal women. A total of 161,838 women aged 50–79 years old were recruited from 40 clinical centers in the US between 1993 and 1998. WHI consists of an observational study, two clinical trials of postmenopausal hormone therapy (estrogen alone or estrogen plus progestin), a calcium and vitamin D supplement trial, and a dietary modification trial<sup>33</sup>. Study recruitment and exclusion criteria have been described previously<sup>33</sup>. Study protocols and consent forms were approved by the IRB at all participating institutions. Medical history was updated annually (for women in the observational study) or semiannually (for women in the clinical trials) by mail and/or telephone questionnaires.

BP was measured by certified staff using standardized procedures and instruments<sup>34</sup>. Two BP measures were recorded after 5 minutes rest using a mercury sphygmomanometer. Appropriate cuff bladder size was determined at each visit based on arm circumference. Diastolic BP was taken from the phase V Korotkoff measures. The average of the two measurements, obtained 30 seconds apart, was used in analyses. Women were asked to bring all of their current prescription and over-the-counter medications to each visit. The WHI SNP Health Association Resource (SHARe) minority cohort includes 8,515 self-identified African American women from WHI who provided written informed consent for study participation and

DNA analysis. Demographic data, medical history and anthropometric measures were obtained at a baseline clinical visit.

**The Howard University Family Study (HUFFS):** is a population-based family study of African Americans in the Washington DC metropolitan area<sup>35</sup>. Investigators enrolled a randomly recruited set of families in addition to a set of unrelated individuals to study genetic and environmental factors of common complex diseases including hypertension. The IRB approved the study protocol, and written informed consent was obtained from all participants. A total of 1,016 individuals were included in this analysis.

BP was measured in the sitting position using an oscillometric device (Omron). Three BP readings were taken with a 10 minute interval between readings. The reported SBP and DBP readings were the average of the second and third readings.

### **Replication African ancestry studies**

#### **Ghana study:**

Participants, of homogeneous Ghanaian ancestry were enrolled into the Ghana study between May 2002 and October 2003 through community recruitment in Sunyani, Ghana. Exclusion criteria were age less than 18, prior enrollment of a first or second degree relative, and any acute illness such as malaria that might affect levels of tissue-type plasminogen activator (t-PA) or plasminogen activator inhibitor-1 (PAI-1). Participants were examined at the Regional Hospital, Sunyani after a 10-hour fast. All participants provided written informed consent or fingerprint consent, and all forms were approved by the IRBs at Vanderbilt University and Regional Hospital, Sunyani. All participants provided medical history and standard demographic data including age, sex, education, smoking status, alcohol consumption, current medications, cardiovascular disease, diabetes, and cancers. Height, weight and BP were measured. Three tubes of blood were taken from each participant, stored in liquid nitrogen, and shipped to VU. Genotyping for this project was conducted using the Sequenom genotyping system at the Vanderbilt DNA Resources Core. A total of seven candidate SNPs were genotyped and analyzed according to the analytic protocol for the discovery GWAS analysis, with the exception that principal components summarizing ancestry were not adjusted for due to the fact that these participants are not admixed. Concordance rates among candidate SNP genotypes for duplicate QC samples from the HapMap were all 100%.

BPs measurements were measured using an Omron HEM-705c instrument (Omron Healthcare Corp., Bannockburn, Ill., USA). Participants were seated in a quiet room and two measures of BP were taken from the left arm. The average of the two measures was used in the analysis. All BP measures were taken prior to blood draws.

**Family Blood Pressure Program-AXIOM.** These 872 African-American subjects were included from the **HyperGEN** and **GENOA** studies but whom were not genotyped with conventional GWAS platforms. The sample schemes are the same as HyperGEN and GENOA. For BP measures see HyperGEN and GENOA descriptions. These African-Americans were genotyped using Affymetrix Axiom chips, which include 808,558 SNPs. SNPs were called using Affymetrix Genotyping Console (GTC) by analyzing CEL files from Affymetrix AXIOM arrays

([www.affymetrix.com](http://www.affymetrix.com)). Samples with Dish QC(DQC) $\leq$ 0.82 were excluded. Samples with call Rate  $\leq$ 0.97 were also dropped. Imputation was performed using MaCH 1.0.17 with parameter "--round 50 --greedy". Reference haplotypes were downloaded from (<http://www.sph.umich.edu/csg/abecasis/MACH/download/HapMap-r21.html>, with ratio of CEU and YRI 1:1). All the replication SNPs have  $R_{sq} > 0.76$ .

**The Health and Retirement Study (HRS):** The HRS is a longitudinal survey of a representative sample of Americans over age 50 sponsored by the National Institute on Aging (NIA) and conducted by the University of Michigan's Institute for Social Research. The sample for this analysis includes 1,337 African Americans (N=483 males, 36.1%) interviewed in 2006 or 2008 with BP measured using a Omron HEM-780 Intellisense. Automated BP monitor with ComFit cuff. Participants that had missing values for both SBP and DBP, had missing values for covariates, and one individual that was  $> 5$  SDs from the mean of BMI were excluded. Mean SBP and DBP from three measures, adjusted for anti-hypertensive medication use (+10 mmHg for SBP, +5 mmHg for DBP) were used as the final quantitative outcome variables. Hypertension was defined as having a mean SBP  $\geq$ 140 mmHg, a mean DBP  $\geq$ 90 mmHg, or self-reported hypertension medication use. Mean SBP was 143.96 mmHg, mean DBP was 85.53 mmHg, and 1073 (80.25%) participants had hypertension. Genotyping was performed by the Center for Inherited Disease Research (CIDR) using Illumina's Human Omni2.5-Quad BeadChip methodology. Genotyping quality control was performed by the Genetics Coordinating Center, Department of Biostatistics, University of Washington, Seattle.

**Mt Sinai IPM Biobank Program:** The Institute for Personalized Medicine (IPM) Biobank Program is a consented, Electronic Medical Record (EMR)-linked medical care setting biorepository of the Mount Sinai Medical Center (MSMC), drawing from a population of over 70,000 inpatients and 800,000 outpatient visits annually. MSMC serves the diverse local communities of upper Manhattan, including Central Harlem (86% African American), East Harlem (88% Hispanic Latino), and Upper East Side (88% Caucasian/white) with broad health disparities. IPM Biobank populations include 28% African American, 38% Hispanic Latino predominantly of Caribbean origin, 23% Caucasian/White. IPM Biobank disease burden is reflective of health disparities with broad public health impact. Since 2007, over 23,000 Mount Sinai patients have enrolled in the IPM Biobank program. Biobank operations are fully integrated in clinical care processes, including direct recruitment from clinical sites waiting areas and phlebotomy stations by dedicated Biobank recruiters independent of clinical care providers, prior to or following a clinician standard of care visit. Recruitment currently occurs at a broad spectrum of over 30 clinical care sites. This present study included only unrelated, adult, self-reported African Americans. For the discovery analysis, participants genotyped on Affymetrix 6.0 in 2010 were included. For the replication analysis, participants genotyped on Illumina OmniExpress in 2012 were included. Information on anthropometrics, demographics, blood pressure and use of antihypertensive medication was derived from participants EMR. The Mount Sinai Biobank Project (IRB # 07-0529 0001 02 ME) operates under an IRB-approved research protocol with IRB-approved informed consent forms. All study participants provided written informed consent. The Mount Sinai IPM Biobank Program is supported by The Andrea and Charles Bronfman Philanthropies.

**The Seychelles TANDEM study:** The TANDEM study is a family-based study conducted in the Republic of Seychelles between 1999 and 2002. The Seychelles islands are located in the Indian Ocean, approximately 2000 km east to Kenya; the majority of the population is of African descent. The study was approved by the ethical committee in Seychelles and at the University of Lausanne, Switzerland and participants provided written informed consent, including for genetic analyses. Methods and main findings have been published in a number of publications. Families were selected from a national hypertension register if the family was from predominantly African descent and one could identify  $\geq 2$  full siblings with hypertension ( $\geq 140/90$  mm Hg, average of 3 office measures or on current antihypertensive treatment) and  $\geq 2$  other first-degree relatives (full siblings or parents) with or without hypertension<sup>36; 37</sup>. Seventy-six of the 135 screened families were found to be eligible. Only persons aged 18 years or older have been included. Three BP measurements were taken at the study center in the morning between 7:00 and 10:30 AM, for participants who had been sitting quietly for at least 10 minutes, by trained health professionals, using a standard mercury sphygmomanometer with a triple-bladder cuff (Tricuff) that automatically adjusts bladder width to arm circumference.

**The Seychelles Heart Study III (2004):** The Seychelles Heart Study III is a population-based survey conducted in 2004 under the auspices of the Ministry of Health of the Republic of Seychelles. The Seychelles islands are located in the Indian Ocean, approximately 2000 km east to Kenya; the majority of the population is of African descent. The survey was approved by the Ministry of Health after technical and ethical reviews. Participants were free to participate and gave written informed consent. Survey methods have been described elsewhere<sup>38</sup> and findings published in over 20 publications. The sampling frame consisted of a sex and age stratified random sample of the entire population aged 25-64 years, using computerized data of a national population census in 2002 thereafter updated by civil status authorities. The survey was attended by 1255 individuals, corresponding to a participation rate of 81%<sup>39</sup>. BP was measured 3 times, at a survey center, in the morning, at intervals of more than 2 minutes, after a participant had been seated for at least 15 minutes, by trained nurses, using a mercury sphygmomanometer and a cuff that automatically adapts width to the arm circumference (Tricuff). BP was based on the average of the last two of three readings.

Genotyping for both **TANDEM** and **Heart Study III** samples from the Seychelles was performed on an Illumina iSelect platform (CardioMetaboChip - <http://www.sph.umich.edu/csg/kang/MetaboChip>) according to standard protocols. Data was cleaned using completeness parameters per individual and per SNP, principal components calculated in the presence of HapMap genotypes, sex mismatch, cryptic family relationships, Mendelian error, and similar parameters as appropriate.

**Justification for the Use of Statins in Prevention: an Intervention Trial Evaluating Rosuvastatin (JUPITER).** The study population was derived from JUPITER, an international, randomized, placebo-controlled trial of rosuvastatin (20mg/day) in the primary prevention of cardiovascular disease conducted among apparently healthy men 50 year or older and women 60 years or older with LDL-C < 130 mg/dL and hsCRP > 2 mg/L<sup>40</sup>. Blood pressure measures were made by a

healthcare professional at baseline. Approximately 70% of JUPITER participants provided blood for DNA extraction at baseline and consent for genetic analysis, among whom approximate 13.7% were self-reported blacks from South Africa. A single BP measure was obtained at time of enrollment.

Genotyping was performed using the Omni 1M Quad platform (Illumina, San Diego). Briefly, raw genotype intensity data were reduced to genotype calls using the Illumina Genome Studio (v. 1.6.2) software (Illumina, San Diego)<sup>41</sup>. SNP clusters were initially defined automatically using data from the JUPITER sample. SNPs with poor automatically defined clusters, ~1%, were visually inspected, and annotated, removed, or clustered again with manual intervention. After these procedures, 99.71% of the loci yielded successful genotype information. All samples had successful genotyping for >98.5% of the final SNPs. Identity-by-state clustering in PLINK<sup>42</sup> applied to 1,435 JUPITER ancestry informative SNPs confirmed a cluster of JUPITER participants who were strongly correlated with self-reported South African ancestry. In total, over 97.4% or 1,688 of the South African black JUPITER participants with consent for genetic analysis remained after successful genotyping and exclusions requiring that no pair of individuals was related more closely than second degree using identity-by-descent clustering procedures in PLINK. EIGENSTRAT<sup>43</sup> was applied on the South African black population to compute covariates for population sub-structure to adjust for potential confounding in association analysis. Analyses followed the standard protocol and included adjustments for age, sex, BMI and markers for population stratification

### **Multi-ethnic samples**

#### **ICBP European samples**

Summary *P*-values results for ICBP European ancestry were obtained from [www.igm.jhmi.edu/~gehret/icbp32413ahsfd134/icbp\\_088023401234-9812599.html](http://www.igm.jhmi.edu/~gehret/icbp32413ahsfd134/icbp_088023401234-9812599.html).

#### **East Asian samples: AGEN**

The Asian Genetic Epidemiology Network (AGEN) is a consortium of genetic epidemiology studies of cardiovascular disease related phenotypes, including BP, diabetes, and obesity, conducted among Asian populations. AGEN-BP consists of 19,608 East Asian participants who underwent standardized collection of BP measurements in eight population- and family-based GWAS, including: the Cardio-metabolic Genome Epidemiology (CAGE) Network, Genetic Epidemiology Network of Salt-Sensitivity (GenSalt), Korean Association Resource (KARE) Project, Shanghai Hypertension Study, Singapore Malay Eye Survey (SiMES), Singapore Prospective Study (SP2) Program, Suita Study, and Taiwan Super Control Study. Each study established a consensus on phenotype harmonization and analytical plan for within-study GWAS and meta-analysis of results across studies. Each study received an approval from the IRB and all participants in each study provided written informed consent for participation in the study. Our study utilized results from selected SNPs from Stage 1, which was a meta-analysis of directly genotyped and imputed SNPs from individuals of East Asian descent, drawn from the population-based or control samples in case-control studies in AGEN-BP, described above. The

BP measures and quality control (QC) criteria for genetic data have been previously described by He *et al.*<sup>44</sup>. All BP measures were taken at least two times, and the average of measures was used for analysis.

Briefly, studies each performed genotyping QC separately, and removed participants that had missing data between 2% and 10%, SNPs with missing data between 5% and 2%, HWE  $P$ -values between  $1 \times 10^{-4}$  and  $1 \times 10^{-6}$ , and SSNP with  $MAF \leq 1\%$ . Ungenotyped SNPs were imputed to phased haplotypes from the International HapMap Consortium CHB (Chinese from Beijing) and JPT (Japanese from Tokyo) reference data using MACH, IMPUTE, or BEAGLE. Association between SNPs and measured quantitative BP traits was assessed with linear regression with adjustment for age, age<sup>2</sup>, sex, BMI, and any study-specific covariates within each study. All within-study genomic control lambdas ( $\lambda$ ) for tests of association with BP outcomes were between 1 and 1.05. Evidence across studies for associations between SNPs and BP was evaluated by inverse-variance weighted fixed-effects meta-analysis using METAL.

## Supplemental Acknowledgments

**BioVU:** The dataset(s) used for the analyses described were obtained from Vanderbilt University Medical Center's BioVU which is supported by institutional funding and by the Vanderbilt CTSA grant 1UL1RR024975-01 from NCRR/NIH. Support was also provided by Vanderbilt Clinical and Translational Research Scholar award (5KL2RR024975 to TLE), and Additional support was provided by the Building Interdisciplinary Research Careers in Women's Health career development program (K12HD4383 to DRVE).

**Bogalusa Heart Study (BHS):** NJS is supported in part by NIH/NCRR Grant Number UL1 RR025774. The BHS was supported by grants HD-061437 and HD-062783 from the National Institute of Child Health and Human Development, and AG-16592 from the National Institute on Aging.

**CARe Acknowledgement:** The authors wish to acknowledge the support of the National Heart, Lung, and Blood Institute and the contributions of the research institutions, study investigators, field staff and study participants in creating this resource for biomedical research. The following nine parent studies have contributed parent study data, ancillary study data, and DNA samples through the Broad Institute (N01-HC-65226) to create this genotype/phenotype data base for wide dissemination to the biomedical research community. This work was also funded by the Center of Excellence in Personalized Medicine (CEPMED), the Canada Research Chair program, the "Fonds de recherche du Québec en Santé (FRQS)", and the "Fondation de l'Institut de Cardiologie de Montréal" (to GL):

**Atherosclerotic Risk in Communities (ARIC):** University of North Carolina at Chapel Hill (N01-HC-55015), Baylor Medical College (N01-HC-55016), University of Mississippi Medical Center (N01-HC-55021), University of Minnesota (N01-HC-55019), Johns Hopkins University (N01-HC-55020), University of Texas, Houston (N01-HC-55017), University of North Carolina, Forsyth County (N01-HC-55018);

**Cardiovascular Health Study (CHS):** University of Washington (N01-HC-85079), Wake Forest University (N01-HC-85080), Johns Hopkins University (N01-HC-85081), University of Pittsburgh (N01-HC-85082), University of California, Davis (N01-HC-85083), University of California, Irvine (N01-HC-85084), New England Medical Center (N01-HC-85085), University of Vermont (N01-HC-85086), Georgetown University (N01-HC-35129), Johns Hopkins University (N01-HC-15103), University of Wisconsin (N01-HC-75150), Geisinger Clinic (N01-HC-45133), University of Washington (N01-HC-55222, U01 HL080295); **Cleveland Family Study (CFS):** Case Western Reserve University (RO1 HL46380-01-16);

**Coronary Artery Risk in Young Adults (CARDIA):** University of Alabama at Birmingham (N01-HC-48047), University of Minnesota (N01-HC-48048), Northwestern University (N01-HC-48049), Kaiser Foundation Research Institute (N01-HC-48050), University of Alabama at Birmingham (N01-HC-95095), Tufts-New England Medical Center (N01-HC-45204), Wake Forest University (N01-HC-45205), Harbor-UCLA Research and Education Institute (N01-HC-05187), University of California, Irvine (N01-HC-45134, N01-HC-95100);

**Multi-Ethnic Study of Atherosclerosis (MESA):** MESA is conducted and supported by the National Heart, Lung, and Blood Institute (NHLBI) in collaboration with MESA investigators. Support for MESA is provided by contracts N01-HC-95159 through N01-HC-95169 and UL1-RR-024156. Funding for genotyping was provided by NHLBI Contract N02-HL-6-4278 and N01-HC-65226.

**CHS:** This CHS research was supported by NHLBI contracts N01-HC-85239, N01-HC-85079 through N01-HC-85086; N01-HC-35129, N01 HC-15103, N01 HC-55222, N01-HC-75150, N01-HC-45133, HHSN268201200036C and NHLBI grants HL080295, HL-085251, HL087652, HL105756 with additional contribution from NINDS. Additional support was provided through AG-023629, AG-15928, AG-20098, and AG-027058 from the NIA. See also <http://www.chs-nhlbi.org/pi.htm>. DNA handling and genotyping was supported in part by National Center of Advancing Translational Technologies CTSI grant UL1TR000124 and National Institute of Diabetes and Digestive and Kidney Diseases grant DK063491 to the Southern California Diabetes Endocrinology Research Center and the Cedars-Sinai Board of Governors' Chair in Medical Genetics (JIR).

**FBPP:** Axiom study is supported by the National Institutes of Health, grant number HL086718 from National Heart, Lung, Blood Institute. Z Zhang and X Zhu are supported by HL086718 from National Heart, Lung, Blood Institute and HG003054 from the National Human Genome Research Institute.

**GeneSTAR:** GeneSTAR was supported by NIH grants through the National Institute of Nursing Research (NR0224103) and the National Heart, Lung, and Blood Institute (HL58625-01A1, HL59684, HL071025-01A1, U01HL72518, and HL087698); and by M01-RR000052 to the Johns Hopkins General Clinical Research Center.

**GENOA:** Genetic Epidemiology Network of Arteriopathy (GENOA) study is supported by the National Institutes of Health, grant numbers HL087660 and HL100245 from the National Heart, Lung, Blood Institute.

**Ghana study:** The authors wish to acknowledge the support of the study investigators, field staff and study participants in creating this resource for biomedical research. The Ghana Study is funded by NLM grant LM010098.

**HANDLS:** The Healthy Aging in Neighborhoods of Diversity across the Life Span Study (HANDLS) research was supported by the Intramural Research Program of the NIH, National Institute on Aging and the National Center on Minority Health and Health Disparities (project # Z01-AG000513 and human subjects protocol # 2009-149). Data analyses for the HANDLS study utilized the high-performance computational capabilities of the Biowulf Linux cluster at the National Institutes of Health, Bethesda, Md. (<http://biowulf.nih.gov>).

**HealthABC:** Health ABC was funded by the National Institutes of Aging. This research was supported by NIA contracts N01AG62101, N01AG62103, and N01AG62106. The GWAS was



funded by NIA grant 1R01AG032098-01A1 to Wake Forest University Health Sciences and genotyping services were provided by the Center for Inherited Disease Research (CIDR). CIDR is fully funded through a federal contract from the National Institutes of Health to The Johns Hopkins University, contract number HHSN268200782096C. This research was supported in part by the Intramural Research Program of the NIH, National Institute on Aging.

**HUFS:** The Howard University Family Study was supported by National Institutes of Health grants S06GM008016-320107 to Charles Rotimi and S06GM008016-380111 to Adebowale Adeyemo. We thank the participants of the study, for which enrollment was carried out at the Howard University General Clinical Research Center, supported by National Institutes of Health grant 2M01RR010284. The contents of this publication are solely the responsibility of the authors and do not necessarily represent the official view of the National Institutes of Health. This research was supported in part by the Intramural Research Program of the Center for Research on Genomics and Global Health (CRGGH). The CRGGH is supported by the National Human Genome Research Institute, the National Institute of Diabetes and Digestive and Kidney Diseases, the Center for Information Technology, and the Office of the Director at the National Institutes of Health (Z01HG200362). Genotyping support was provided by the Coriell Institute for Medical Research.

**HyperGEN:** The hypertension network is funded by cooperative agreements (U10) with NHLBI: HL54471, HL54472, HL54473, HL54495, HL54496, HL54497, HL54509, HL54515, and 2 R01 HL55673-12. The study involves: University of Utah (Network Coordinating Center, Field Center, and Molecular Genetics Lab); Univ. of Alabama at Birmingham (Field Center and Echo Coordinating and Analysis Center); Medical College of Wisconsin (Echo Genotyping Lab); Boston University (Field Center); University of Minnesota (Field Center and Biochemistry Lab); University of North Carolina (Field Center); Washington University (Data Coordinating Center); Weil Cornell Medical College (Echo Reading Center); National Heart, Lung, & Blood Institute. For a complete list of HyperGEN Investigators please see: [www.biostat.wustl.edu/hypergen/Acknowledge.html](http://www.biostat.wustl.edu/hypergen/Acknowledge.html)

**Loyola-Nigeria:** The Loyola-Nigeria study was supported by NIH grant numbers R01-HL053353. The authors acknowledge the assistance of the research staff and participants in Ibadan and Igbo-Ora, Oyo State, Nigeria.

**Loyola-Maywood:** Maywood African-American study is supported by the National Institutes of Health grant number HL074166 from National Heart, Lung, Blood Institute.

**Mt Sinai IPM Study:** The Mt. Sinai IPM study was supported by The Andrea and Charles Bronfman Philanthropies. The authors would like to thank the participants from New York City, United States, for participating in the Mount Sinai IPM Biobank Program.

**SIGNET:** We would like to thank all of the participants of the REGARDS Study for their valuable contributions, as well as REGARDS investigators and staff. The REGARDS Study research was

supported by a cooperative agreement U01 NS041588 (Howard) and R01 DK084350 (Sale) from the National Institutes of Health.

**WHI:** The WHI program is funded by the National Heart, Lung, and Blood Institute, National Institutes of Health, U.S. Department of Health and Human Services through contracts N01WH22110, 24152, 32100-2, 32105-6, 32108-9, 32111-13, 32115, 32118-32119, 32122, 42107-26, 42129-32, and 44221.

**HRS:** HRS is supported by the National Institute on Aging (NIA U01AG009740). The genotyping was funded separately by the National Institute on Aging (RC2 AG036495, RC4 AG039029). Genotyping was conducted by the NIH Center for Inherited Disease Research (CIDR) at Johns Hopkins University. Genotyping quality control and final preparation of the data were performed by the Genetics Coordinating Center at the University of Washington.

**JUPITER:** Genetic analysis in the JUPITER study was funded by AstraZeneca.

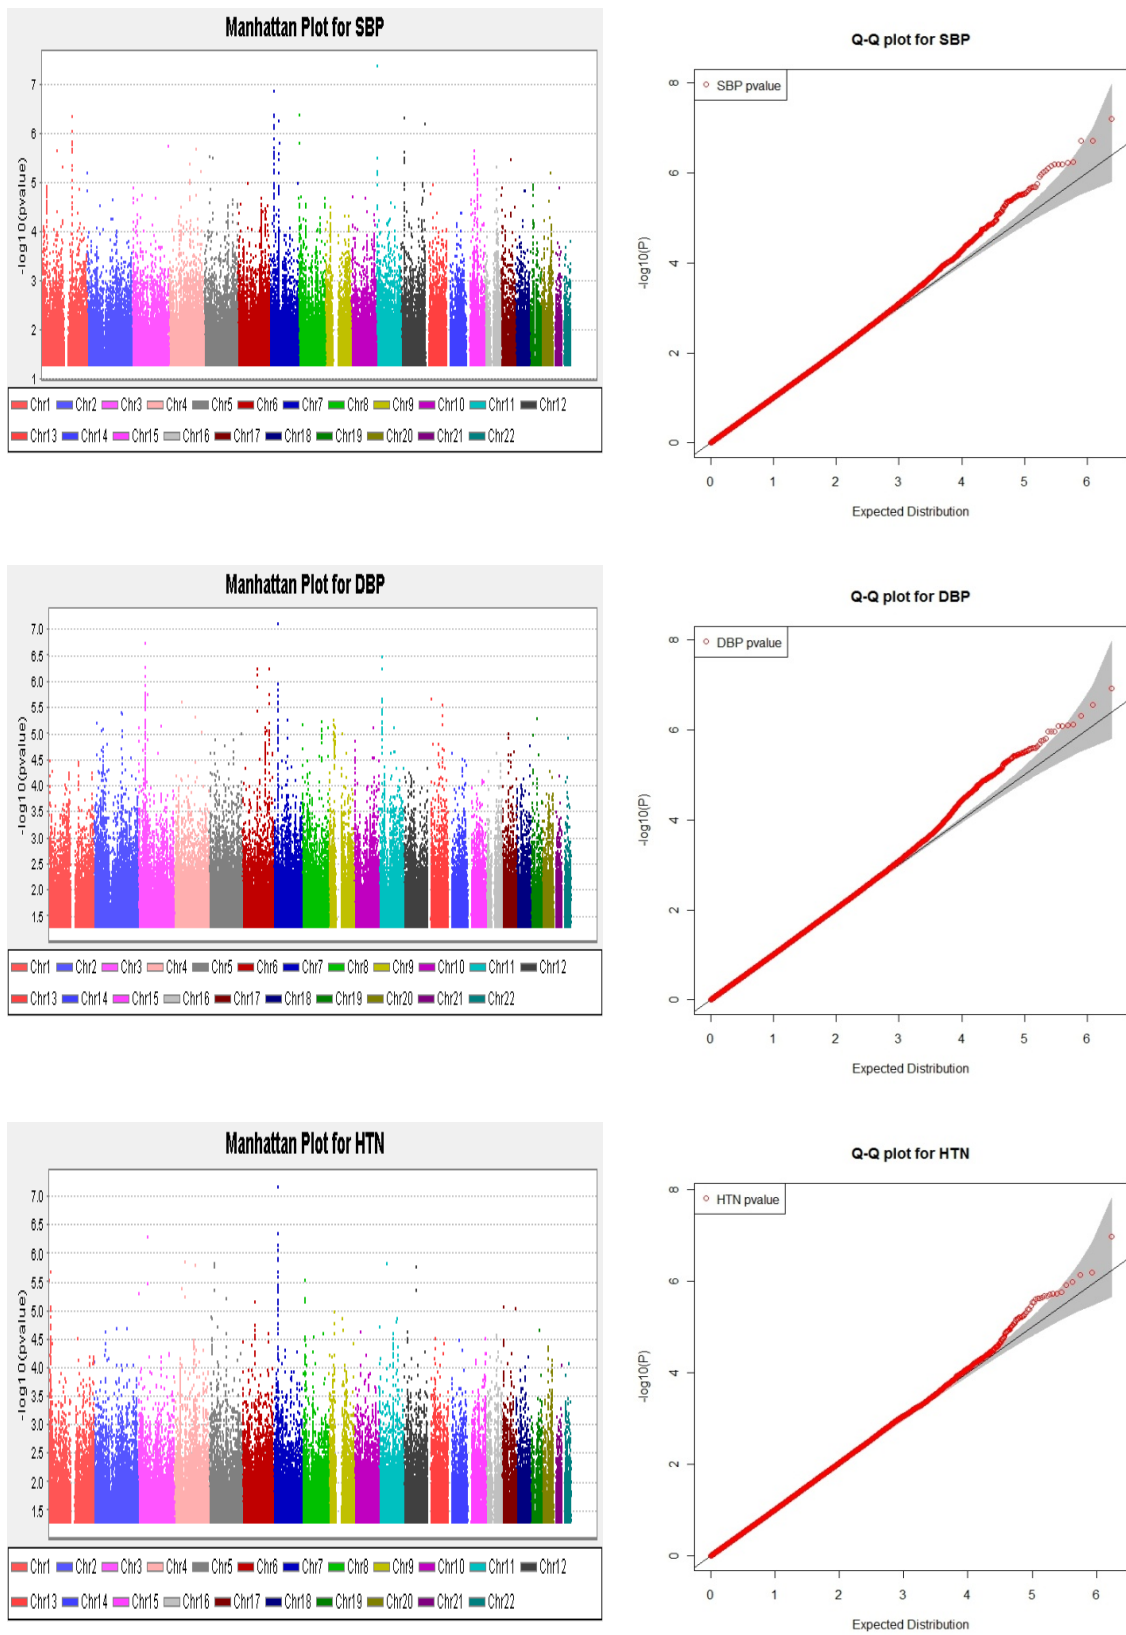

**Figure S1.** Genome-wide association Manhattan plots and Q-Q plots of SBP, DBP and HTN in the Continental Origins and Genetic Epidemiology Network (COGENT). GWAS Manhattan and Q-Q plots are illustrated for SBP, DBP and hypertension (HTN) in COGENT.

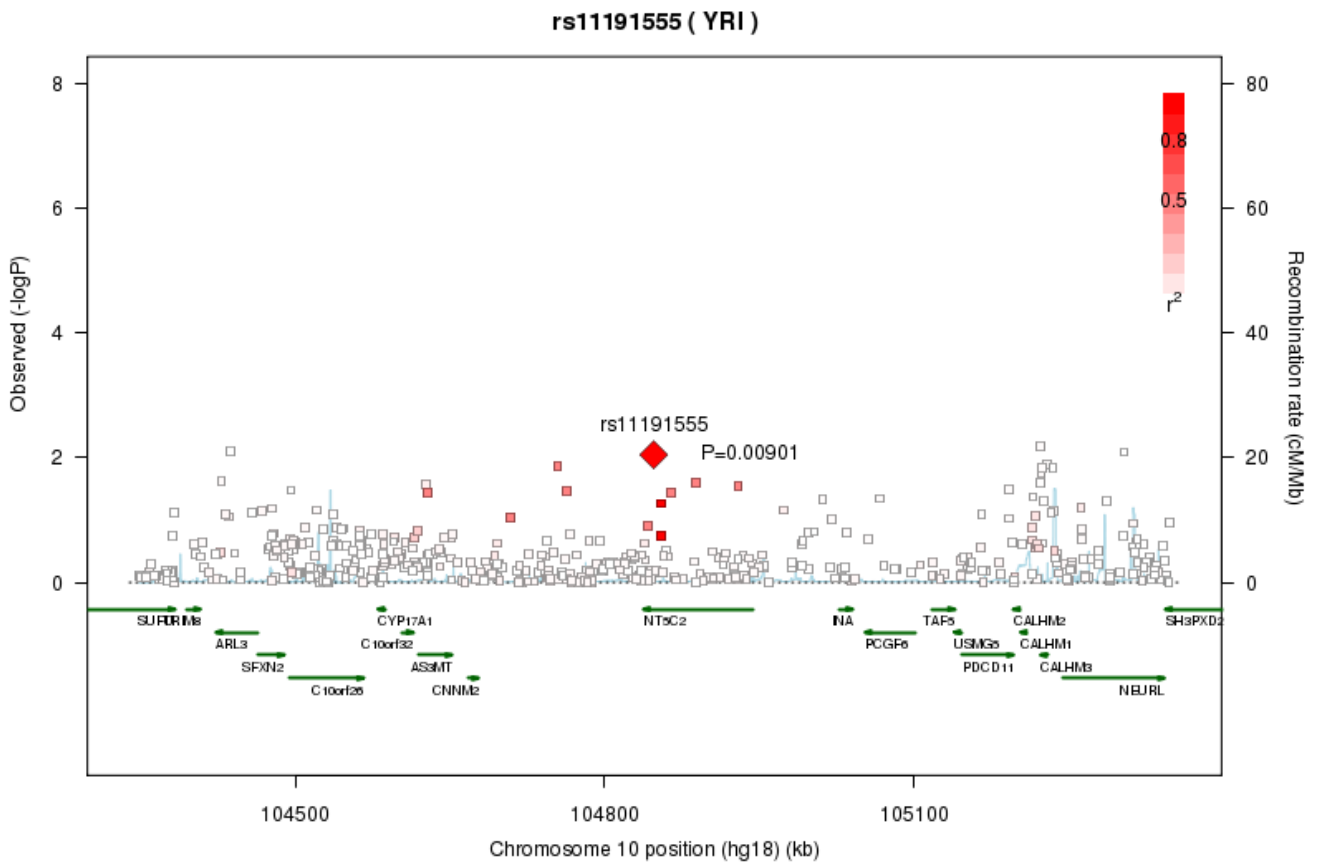

**Figure S2.** Regional plot of  $-\log_{10}(P\text{-value})$  of *NT5C2* and SBP. The LD is based on YRI 1000G data. rs11191555 is the most significant SNP in this locus in COGENT AA data.

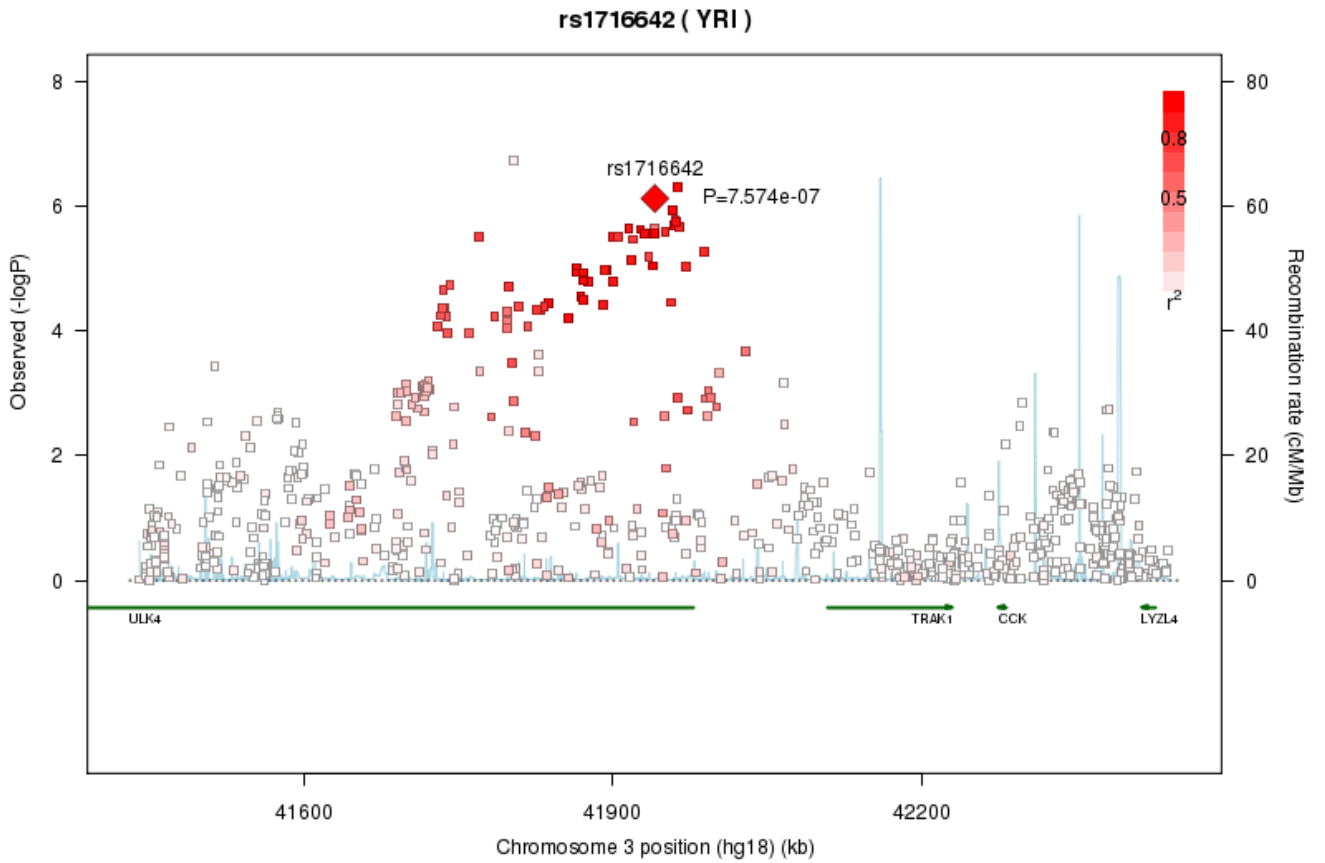

**Figure S3.** Regional plot of  $-\log_{10}(P\text{-value})$  of *ULK4* and DBP. The LD is based on YRI 1000G data. rs1716642 is the most significant SNP in this locus in COGENT AA data.

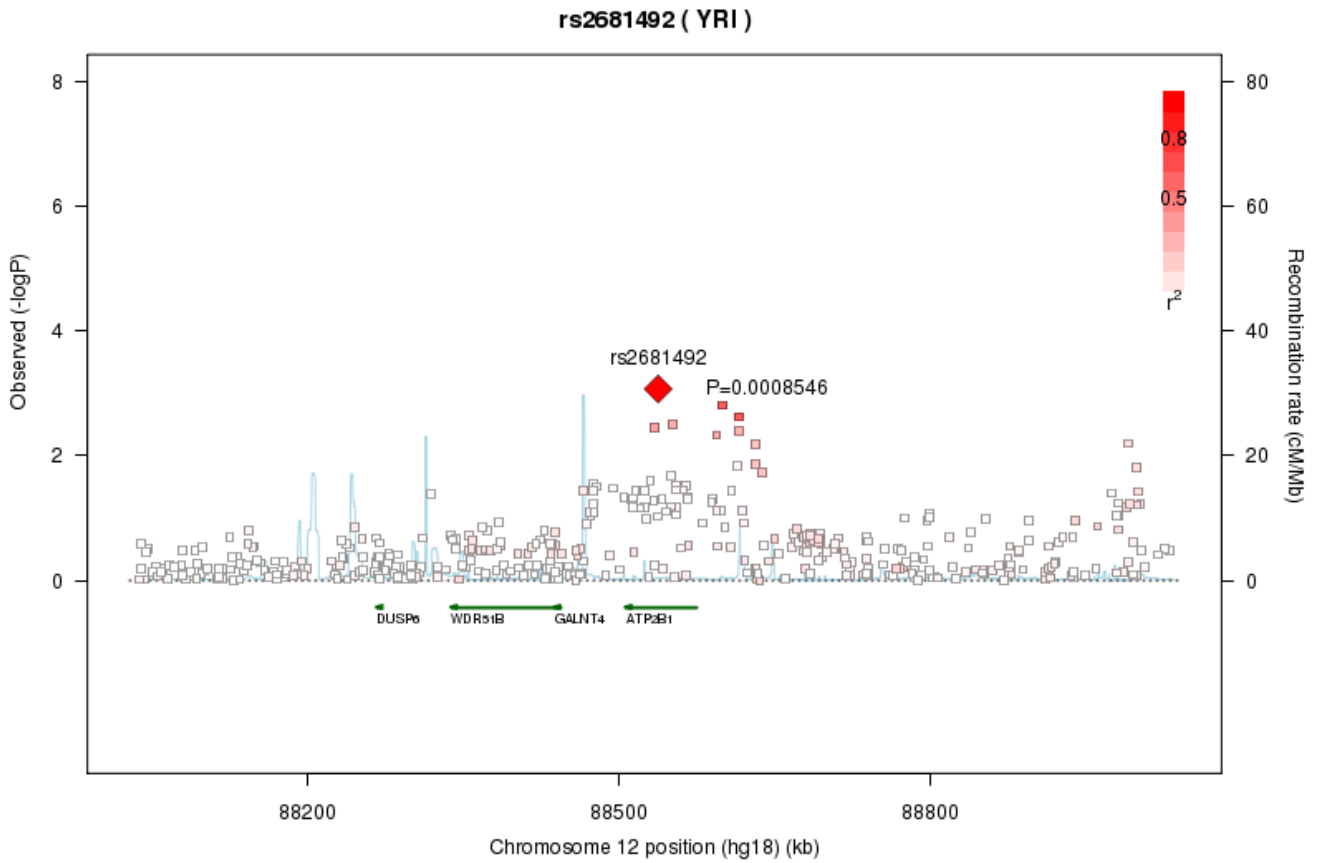

**Figure S4.** Regional plot of  $-\log_{10}(P\text{-value})$  of *ATP2B1* and *HTN*. The LD is based on YRI 1000G data. rs2681492 is the most significant SNP in this locus in COGENT AA data.

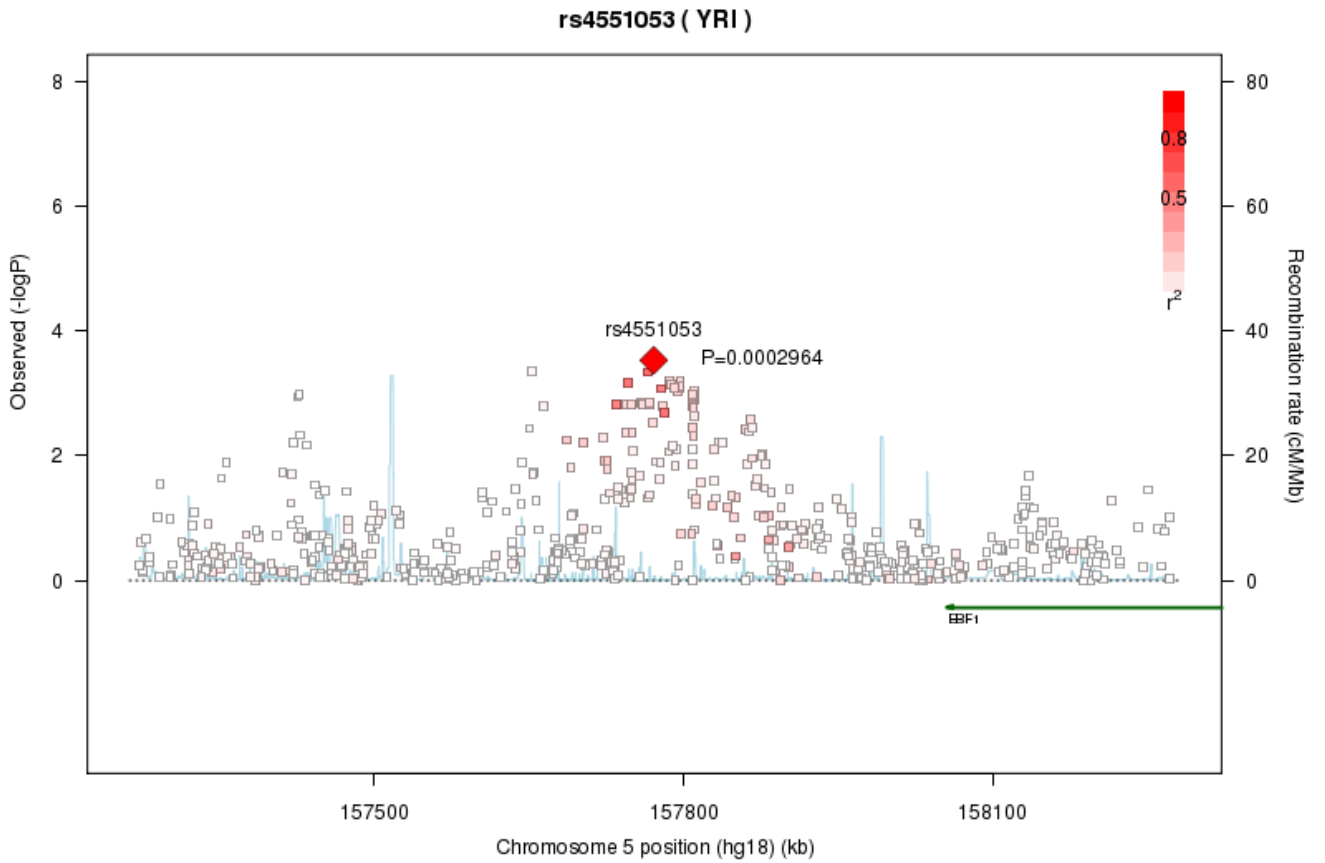

**Figure S5.** Regional plot of  $-\log_{10}(P\text{-value})$  of *EBF1* and HTN. The LD is based on YRI 1000G data. rs4551053 is the most significant SNP in this locus in COGENT AA data.

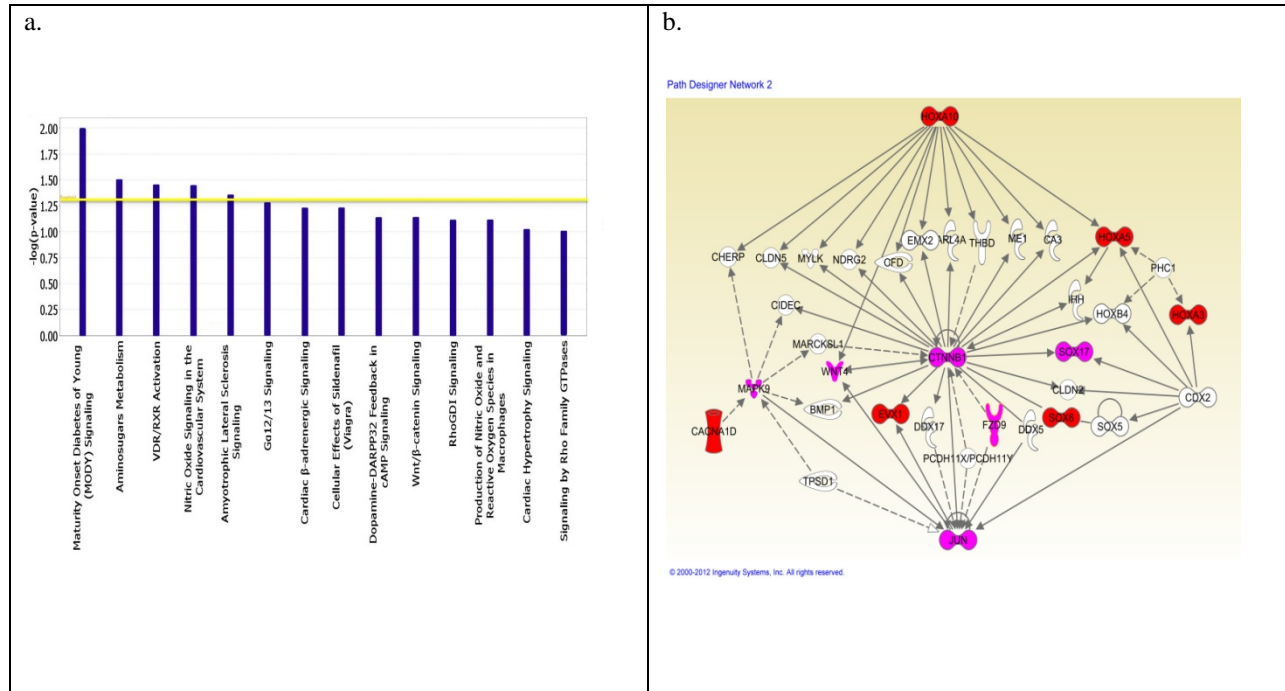

**Figure S6.** A. Canonical pathways and associated  $p$ -values identified by ingenuity pathway analysis (IPA). The yellow horizontal line is the threshold for  $P=0.05$  with the names of the imputed genes shaded in red. B. Network constructed using the identified genes in GWAS by IPA. *CTNFB1* has the most connections in the network. Multiple genes including *SOX6*, *EVX1*, *HOXA* family genes and *CACNA1D* are present in this network.



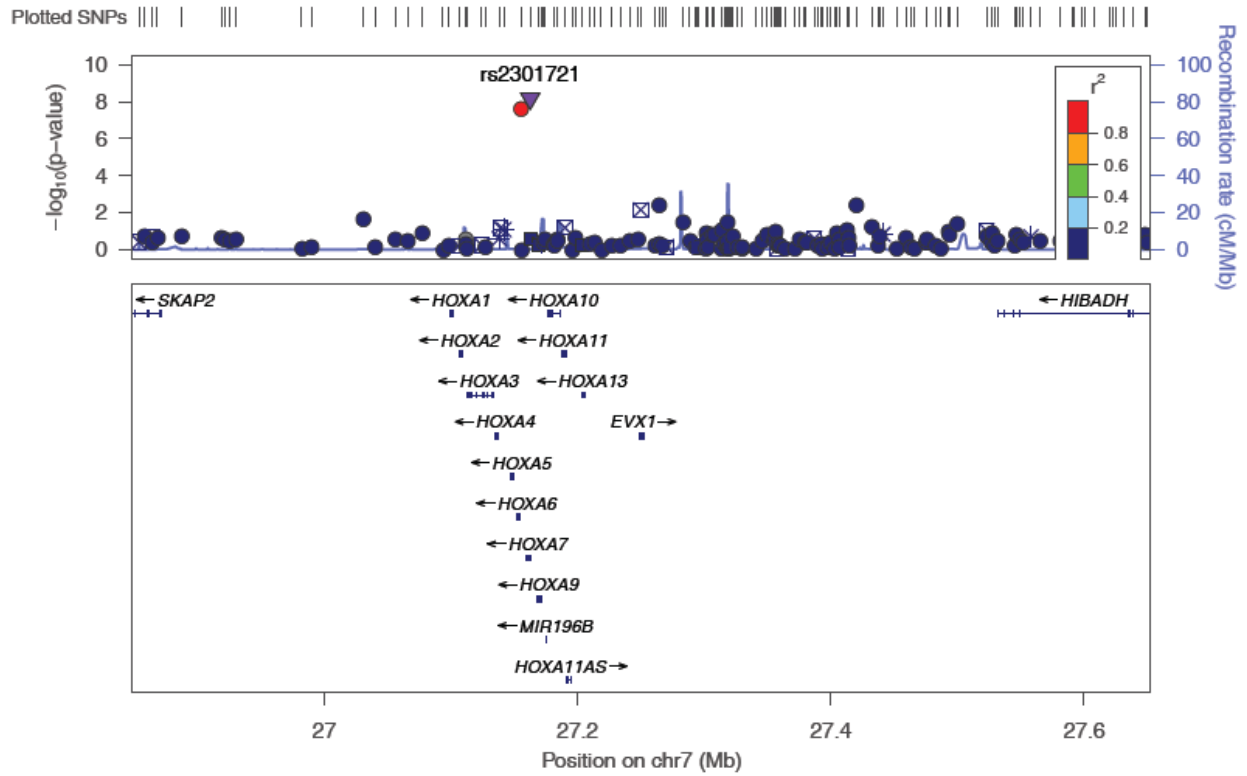

**Figure S7.** Regional plot of  $-\log(P\text{-values})$  from Treeselect analysis along the LWK branch of an unrooted tree with LWK, YRI and AA samples.

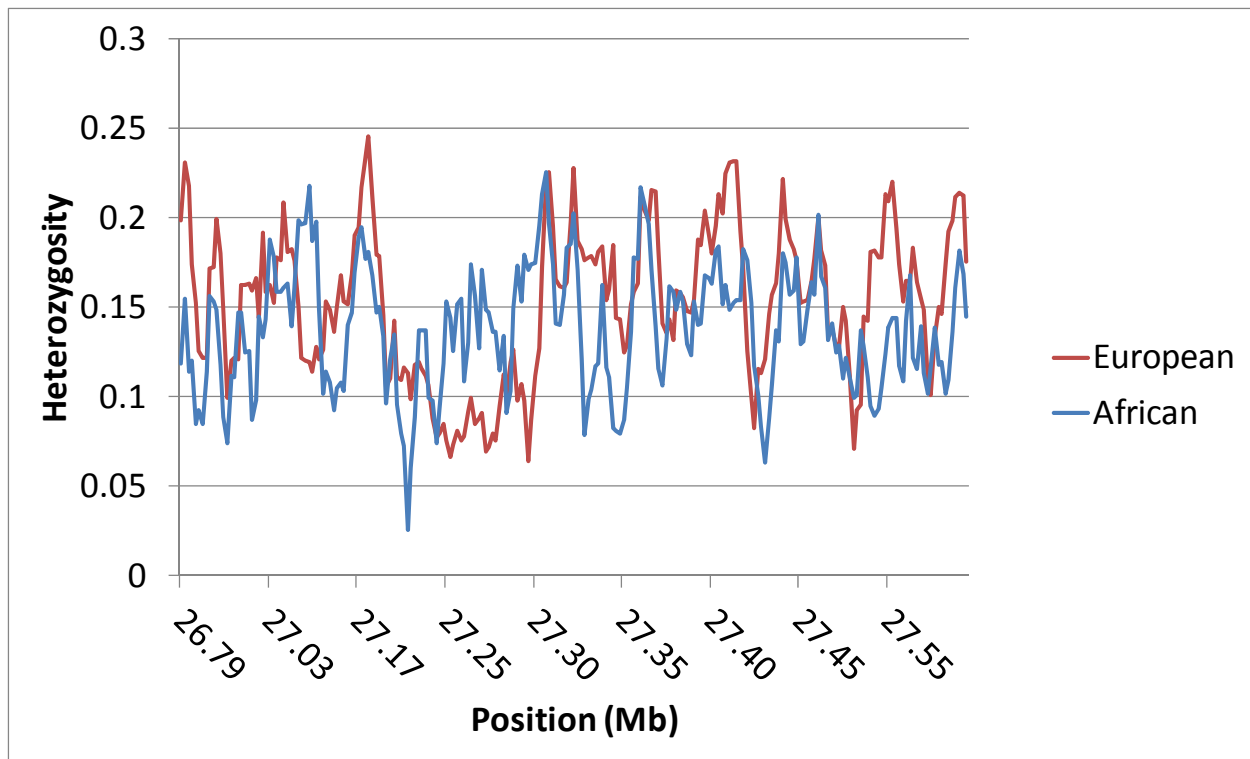

**Figure S8.** Regional heterozygosity in European and African Human Genome Diversity Project (HGDP) participants, with a decrease in heterozygosity in Europeans at the *HOX* gene cluster on chromosome 7 from 27.18 to 27.3 Mb.

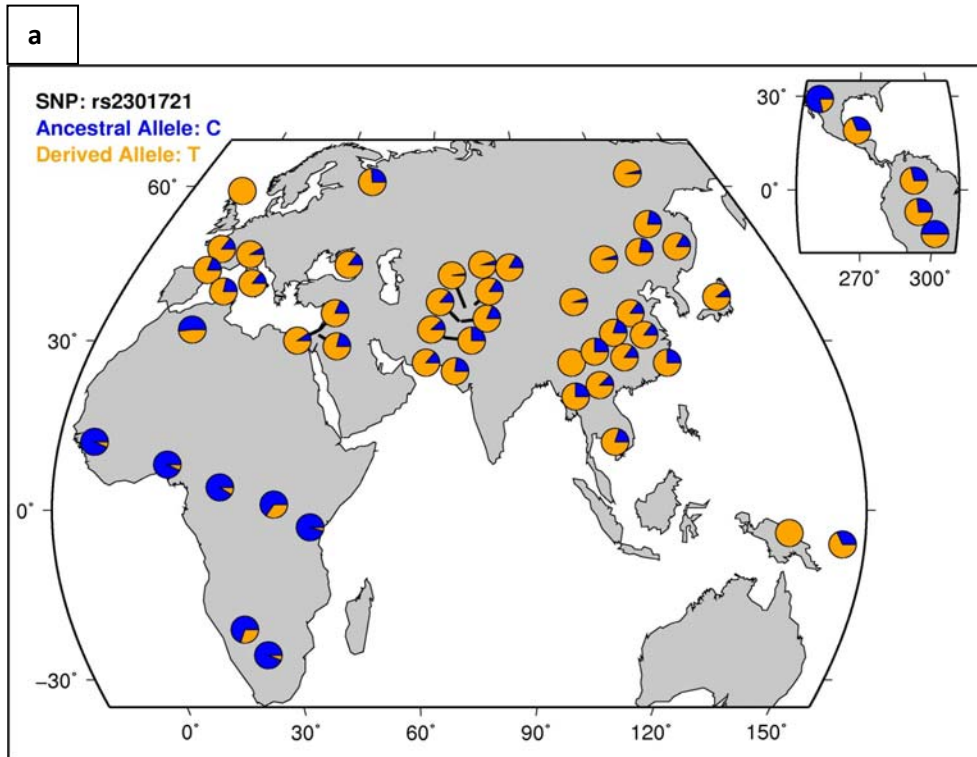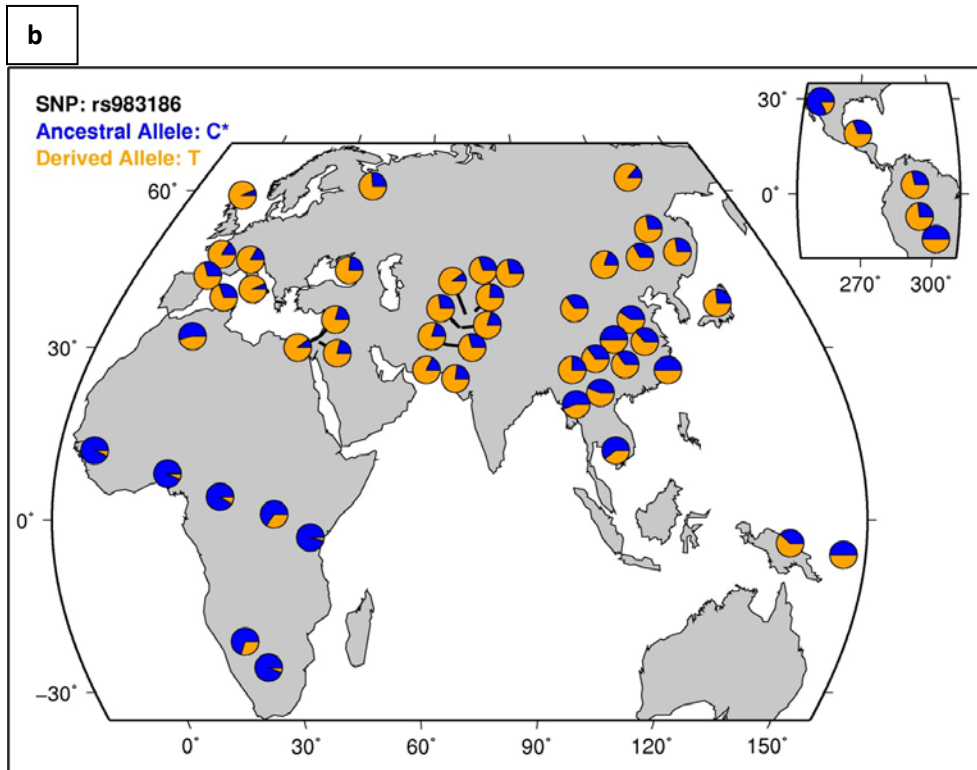

**Figure S9.**

(A) Map of allele frequencies from the Human Genome Diversity Project (HGDP) for the non-synonymous SNP rs2301721 in *HOXA7*;

(B) Map of allele frequencies from the HGDP for rs983186 near *EVX1*.

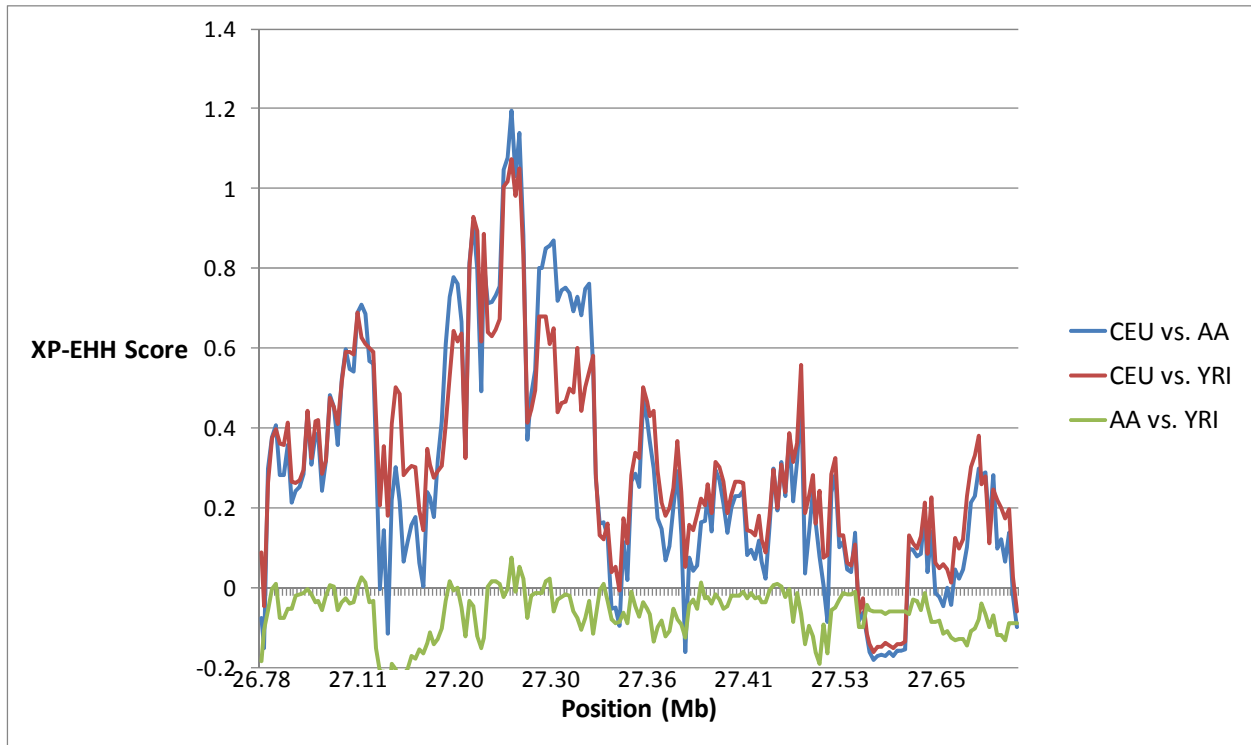

**Figure S10.** XP-EHH Scores for the *EVX1/HOXA* region for HapMap and African Ancestry samples. Signatures of recent positive selection across the *EVX1/HOXA* region in HapMap Phase III Yoruba (YRI) and European CEPH (CEU), and BioVU African Americans (AA) using the cross-population extended haplotype homozygosity statistic (XP-EHH).

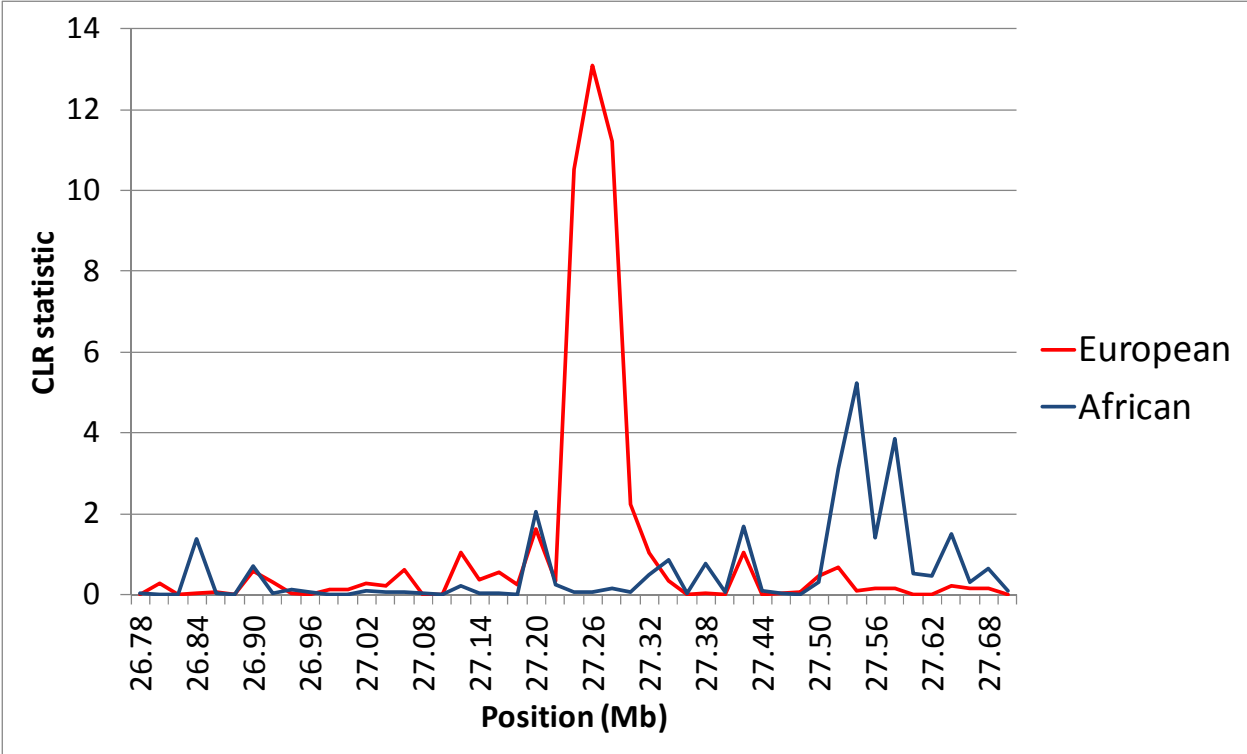

**Figure S11.** CLR statistics for Human Genome Diversity Project (HGDP) participants from Europe and Bantu-speaking Africans in the *HOXA/EVX1* region.

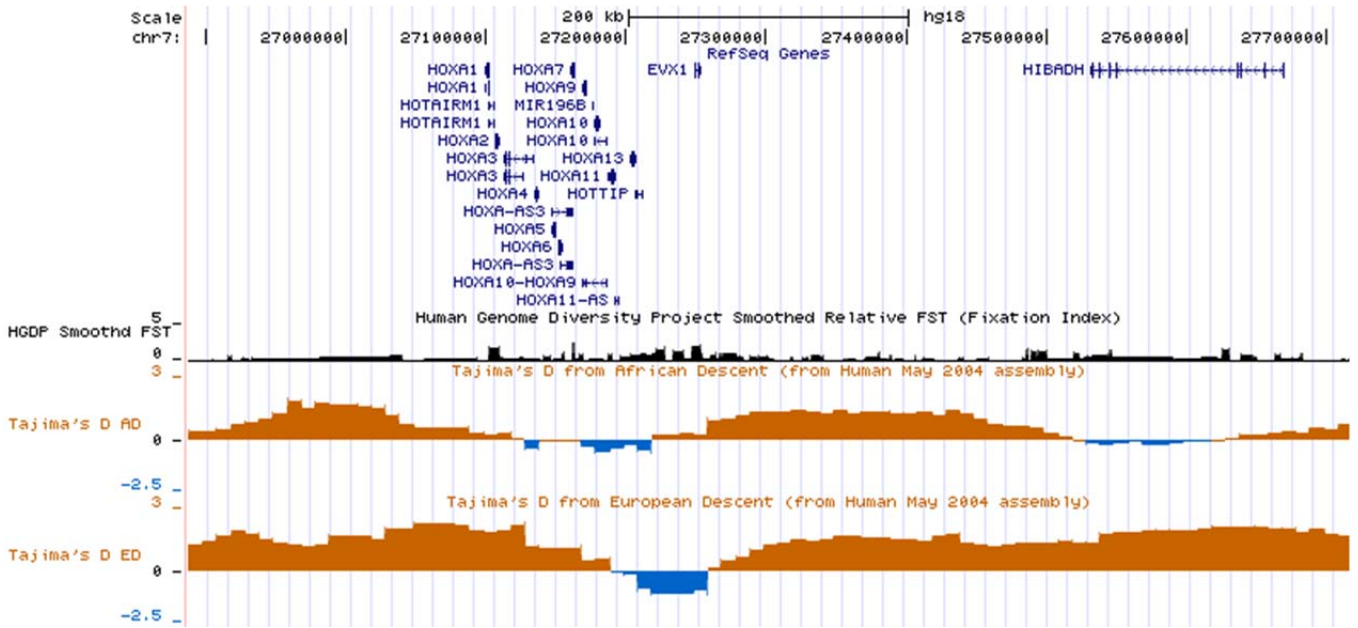

**Figure S12.** Calculations of Tajima's D from HapMap European (CEU) and African (YRI) participants, with negative values near the *HOX* gene cluster supporting recent positive selection at this locus.

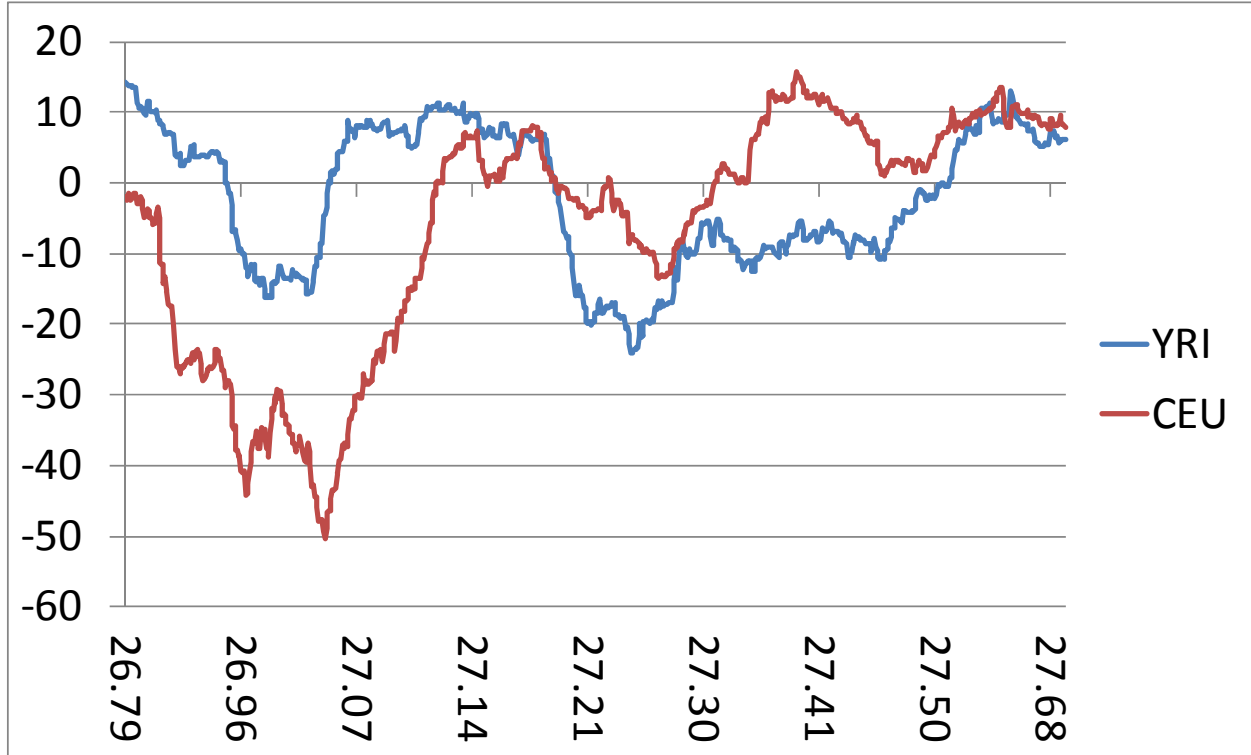

**Figure S13.** Calculation of Fay and Wu's H from European (CEU) and African HapMap (YRI) participants, with negative values nearby the *HOX* gene cluster.





**Table S1. Genome-wide Genotyping and Imputation Information by Study**

| Study           | Genotyping Platform                                   | Genotyping calling algorithm   | Genotype filter                                                                                                                            | Imputation    | Imputation HapMap reference                                                                                                                         | Imputation NCBI version |
|-----------------|-------------------------------------------------------|--------------------------------|--------------------------------------------------------------------------------------------------------------------------------------------|---------------|-----------------------------------------------------------------------------------------------------------------------------------------------------|-------------------------|
| BioVu           | Illumina Human 1M-DuoV3 array                         | Illumina BeadStudio            | No palindromic SNPs, Call rate < 95%, MAF < 0.01, HWE $p < 0.0000001$ ,                                                                    | IMPUTE v2.1.2 | YRI/CEU 1:1 ratio                                                                                                                                   | b36                     |
| ARIC†           | Affymetrix GeneChip SNP Array 6.0                     | BirdSeed                       | Call rates<95%, mapped to more than one locus                                                                                              | MACH          | YRI/CEU 1:1 ratio                                                                                                                                   | b36                     |
| CARDIA†         | Affymetrix GeneChip SNP Array 6.0                     | BirdSeed                       | Call rates<90%, mapped to more than one locus                                                                                              | MACH          | YRI/CEU 1:1 ratio                                                                                                                                   | b36                     |
| CFS†            | Affymetrix GeneChip SNP Array 6.0                     | BirdSeed                       | Call rates<90%, mapped to more than one locus, Mendelian inconsistency                                                                     | MACH          | YRI/CEU 1:1 ratio                                                                                                                                   | b36                     |
| JHS†            | Affymetrix GeneChip SNP Array 6.0                     | BirdSeed                       | Call rates<90%, mapped to more than one locus                                                                                              | MACH          | YRI/CEU 1:1 ratio                                                                                                                                   | b36                     |
| MESA†           | Affymetrix GeneChip SNP Array 6.0                     | BirdSeed                       | Call rates<90%, mapped to more than one locus                                                                                              | MACH          | YRI/CEU 1:1 ratio                                                                                                                                   | b36                     |
| CHS             |                                                       |                                |                                                                                                                                            |               | Imputation in 2 phases: HapMap III from ASW, YRI & CEU & HapMap II using CEU & YRI, & resulting 3 sets merged (final imputed data: 2,770,583 SNPs). |                         |
|                 | Illumina HumanOmni1-Quad_v1 BeadChip system           | Illumina GenomeStudio software | Call rate < 97%, HWE $P < 10^{-5}$ , > 1 duplicate error or Mendelian inconsistency (for reference CEPH trios), heterozygote frequency = 0 | BEAGLE v3.2.1 |                                                                                                                                                     | b36                     |
| GeneSTAR        | Illumina Human 1Mv1_c Array                           | BeadStudio                     | Call rates <90%                                                                                                                            | MACH          | YRI/CEU 1:1 ratio                                                                                                                                   | HapMap2_r21_b36         |
| GENOA           | Affymetrix GeneChip SNP Array 6.0 & Illumina 1M array | BirdSeed and Beadstudio        | Call rates < 95%                                                                                                                           | MACH          | YRI/CEU 1:1 ratio                                                                                                                                   | HapMap2_r22_b36         |
| HANDLS          | 1M Illumina                                           | Illumina GenomeStudio          | Call rates<95%, mapped to more than one locus                                                                                              | MACH          | YRI/CEU 1:1 ratio                                                                                                                                   | HapMap2_r22_b36         |
| HealthABC       | Genotyping Platform 1M Illumina                       | Illumina GenomeStudio          | Call rates < 97%                                                                                                                           | MACH          | YRI/CEU 1:1 ratio                                                                                                                                   | HapMap2_r22_b37         |
| HyperGEN        | Affymetrix GeneChip SNP Array 6.0                     | BirdSeed                       | Call rates < 95%                                                                                                                           | MACH          | YRI/CEU 1:1 ratio                                                                                                                                   | HapMap2_r22_b36         |
| Maywood-Loyola  | Affymetrix GeneChip SNP Array 6.0                     | BirdSeed                       | Call rates < 95%                                                                                                                           | MACH          | YRI/CEU 1:1 ratio                                                                                                                                   | HapMap2_r22_b36         |
| Maywood-Nigeria | Affymetrix GeneChip SNP Array 6.0                     | BirdSeed                       | Call rates < 95%                                                                                                                           | MACH          | YRI                                                                                                                                                 | HapMap2_r22_b36         |
| Mt Sinai study  | Affymetrix GeneChip SNP Array 6.0                     | BirdSeed                       | Call rates < 95%                                                                                                                           | MACH          | CEU/YRI/JPT/CHB                                                                                                                                     | HapMap2_r22_b36         |
| WHI-SHARE       | Affymetrix GeneChip SNP Array 6.0                     | Birdseed v2                    | Call rates < 95%                                                                                                                           | MACH          | YRI/CEU 1:1 ratio                                                                                                                                   | HapMap2_r22_b37         |

| Study    | Genotyping Platform                        | Imputation Software | Quality Control Metrics                                   | Imputation Method | Reference Population                                                                          | Number of SNPs    |
|----------|--------------------------------------------|---------------------|-----------------------------------------------------------|-------------------|-----------------------------------------------------------------------------------------------|-------------------|
| HUFS     | Affymetrix GeneChip SNP Array 6.0          | BirdSeed v2         |                                                           |                   | Combined HapMap phase II+III YRI/CEU, 2 rounds of imputation, YRI then CEU, followed by merge | HapMap2+3_r28_b36 |
| Bogalusa | Illumina Human 610 + Illumina CVD BeadChip | Illumina BeadStudio | Call rates < 95%, MAF<0.01, HWE $\geq 1.0 \times 10^{-3}$ | MACH              |                                                                                               |                   |
|          |                                            |                     | Call rates < 90%                                          | MACH              | YRI/CEU 1:1 ratio                                                                             | HapMap2_r22_b36   |
| SIGNET   | Affymetrix GeneChip SNP Array 6.0          | BirdSeed v1.33      | Call rates < 95%                                          | MACH              | YRI/CEU 1:1 ratio                                                                             | HapMap2_r22_b36   |

† Members of the NHLBI Candidate gene Association Resource (CARE).

Genome-wide genotyping and imputation information by study within the Continental Origins and Genetic Epidemiology Network (COGENT).

Abbreviations: Biological bank of Vanderbilt University (BioVU); Atherosclerosis Risk In Communities (ARIC); Coronary Artery Risk Development in Young Adults (CARDIA); Cleveland Family Study (CFS); Jackson Heart Study (JHS); Multi-Ethnic Study of Atherosclerosis (MESA); Cardiovascular Health Study (CHS); Genetic Study of Atherosclerosis Risk (GeneSTAR); Genetic Epidemiology Network of Arteriopathy (GENOA); The Healthy Aging in Neighborhoods of Diversity Across the Life Span Study (HANDLS); Health, Aging, and Body Composition (Health ABC) Study; The Hypertension Genetic Epidemiology Network (HyperGEN); Mount Sinai, New York City, USA study (Mt Sinai Study); Women's Health Initiative SNP Health Association Resource (WHI-SHARE); Howard University Family Study (HUFS); Bogalusa Heart Study (BHS); Sea Islands Genetic NETWORK (SIGNET). MAF, minor allele frequency; HWE, Hardy Weinberg Equilibrium; SNP, single nucleotide polymorphism.

**Table S2. Lambda ( $\lambda$ ) values for the COGENT discovery genome-wide association studies.**

| Study          | Number        | Lambda HTN | Lambda SBP | Lambda DBP |
|----------------|---------------|------------|------------|------------|
| BioVu          | 941           | 1.011      | 0.993      | 0.978      |
| CARe-ARIC      | 2,511         | 1.033      | 1.027      | 1.023      |
| CARe-CARDIA    | 833           | 1.051      | 1.003      | 0.999      |
| CARe-CFS       | 489           | 1.048      | 1.038      | 1.044      |
| CARe-JHS       | 2,017         | 1.022      | 1.025      | 1.04       |
| CARe-MESA      | 1,623         | 1.004      | 0.998      | 1.025      |
| CHS            | 815           | 1.025      | 1.027      | 1.023      |
| GeneSTAR       | 1,132         | 1.052      | 1.02       | 1.011      |
| GENOA          | 996           | 1.102      | 1.012      | 1.007      |
| HANDLS         | 950           | 1.013      | 0.992      | 0.988      |
| HealthABC      | 1,139         | 1.008      | 0.996      | 0.996      |
| HyperGEN       | 1,252         | 1.058      | 1.016      | 1.018      |
| Maywood-Loyola | 743           | 1.031      | 1.008      | 1.001      |
| Mt Sinai study | 873           | 1.032      | 0.966      | 0.966      |
| Nigeria-Loyola | 1,188         | 1.118      | 1.107      | 1.091      |
| WHI-SHARe      | 8,094         | 1.020      | 1.011      | 1.011      |
| HUFS           | 1,017         | 1.031      | 1.041      | 1.056      |
| Bogalusa       | 368           | 1.018      | 1.011      | 1.011      |
| SIGNET-REGARDS | 2,394         | 0.996      | 1.013      | 1.013      |
| total          | <b>29,375</b> |            |            |            |

Abbreviations: Biological bank of Vanderbilt University (BioVU); Atherosclerosis Risk In Communities (ARIC); Coronary Artery Risk Development in Young Adults (CARDIA); Cleveland Family Study (CFS); Jackson Heart Study (JHS); Multi-Ethnic Study of Atherosclerosis (MESA); Cardiovascular Health Study (CHS); Genetic Study of Atherosclerosis Risk (GeneSTAR); Genetic Epidemiology Network of Arteriopathy (GENOA); The Healthy Aging in Neighborhoods of Diversity Across the Life Span Study (HANDLS); Health, Aging, and Body Composition (Health ABC) Study; The Hypertension Genetic Epidemiology Network (HyperGEN); Mount Sinai, New York City, USA study (Mt Sinai Study); Women's Health Initiative SNP Health Association Resource (WHI-SHARe); Howard University Family Study (HUFS); Bogalusa Heart Study (BHS); Sea Islands Genetic NETWORK (SIGNET).

**Table S3. SNPs with P<1.0 x 10<sup>-5</sup> in COGENT for Systolic Blood Pressure, Diastolic Blood Pressure or Hypertension.**

| SNPID      | Ch<br>r | Position<br>(build 36) | Coded<br>allele | Other<br>allele | Coded<br>allele<br>frequenc<br>y | DBP   |      |          |             |         | SBP   |      |          |             |         | Hypertension |      |          |             |         | HapMap YRI          |                            | HapMap CEU |      |     |      |
|------------|---------|------------------------|-----------------|-----------------|----------------------------------|-------|------|----------|-------------|---------|-------|------|----------|-------------|---------|--------------|------|----------|-------------|---------|---------------------|----------------------------|------------|------|-----|------|
|            |         |                        |                 |                 |                                  | beta  | SE   | P        | Het<br>PVal | N       | beta  | SE   | P        | Het<br>PVal | N       | beta         | SE   | P        | Het<br>PVal | N       | Gene<br>nearby      | GeneVariant                | MAF        | MAF  | MAF | MAF  |
|            |         |                        |                 |                 |                                  |       |      |          |             |         |       |      |          |             |         |              |      |          |             |         |                     |                            |            |      |     |      |
| rs2745282  | 1       | 11552817               | t               | g               | 0.22                             | 0.36  | 0.11 | 1.69E-03 | 6.55E-03    | 29090.9 | 0.64  | 0.19 | 9.22E-04 | 6.87E-01    | 29091.9 | 0.10         | 0.05 | 4.33E-02 | 6.87E-01    | 10860.9 | N/A                 | INTERGENIC                 | T          | 0.03 | G   | 0.28 |
| rs351361   | 1       | 11284408               | t               | c               | 0.20                             | -0.45 | 0.14 | 1.84E-03 | 4.55E-01    | 27940.9 | -1.11 | 0.24 | 4.60E-06 | 8.72E-01    | 27941.9 | -0.07        | 0.03 | 1.75E-02 | 5.13E-01    | 27454.9 | WNT2B               | INTRONIC                   | T          | 0.14 | T   | 0.19 |
| rs7522390  | 1       | 16561530               | a               | g               | 0.27                             | 0.25  | 0.10 | 1.65E-02 | 1.55E-01    | 28906   | 0.88  | 0.17 | 4.41E-07 | 1.68E-01    | 28907   | 0.08         | 0.04 | 7.70E-02 | 2.41E-01    | 8765    | POU2F1              | INTRONIC                   | A          | 0.29 | A   | 0.27 |
| rs10925060 | 1       | 24571776               | t               | c               | 0.16                             | 0.35  | 0.13 | 7.13E-03 | 5.77E-01    | 28940   | 0.49  | 0.22 | 2.26E-02 | 5.00E-01    | 28941   | 0.10         | 0.03 | 6.91E-04 | 4.31E-01    | 27184   | N/A                 | UPSTREAM                   | T          | 0.22 | T   | 0.04 |
| rs13405738 | 2       | 1929865                | t               | c               | 0.85                             | -0.28 | 0.14 | 4.71E-02 | 2.57E-01    | 29294   | -1.05 | 0.23 | 5.94E-06 | 7.16E-01    | 29295   | -0.13        | 0.03 | 7.69E-05 | 3.29E-01    | 27170   | MYT1L               | INTRONIC                   | C          | 0.12 | C   | 0.16 |
| rs17570579 | 2       | 50955087               | t               | c               | 0.07                             | 0.85  | 0.19 | 8.07E-06 | 3.79E-01    | 29321   | 1.02  | 0.32 | 1.28E-03 | 4.07E-01    | 29322   | 0.09         | 0.04 | 4.35E-02 | 6.74E-01    | 27564   | NRXN1               | INTRONIC                   | T          | 0.01 | T   | 0.22 |
| rs1534260  | 2       | 15660279               | t               | c               | 0.36                             | -0.44 | 0.10 | 4.02E-06 | 1.62E-03    | 29303.7 | -0.49 | 0.16 | 2.32E-03 | 1.30E-03    | 29304.7 | -0.08        | 0.04 | 2.72E-02 | 2.77E-01    | 11401.7 | N/A                 | INTERGENIC                 | T          | 0.40 | T   | 0.09 |
| rs234790   | 3       | 7055901                | c               | g               | 0.18                             | -0.41 | 0.13 | 1.78E-03 | 8.64E-01    | 29065.9 | -0.96 | 0.22 | 1.26E-05 | 8.71E-01    | 29066.9 | -0.02        | 0.04 | 6.55E-01 | 1.11E-01    | 13990.9 | GRM7                | INTRONIC                   | C          | 0.07 | C   | 0.40 |
| rs1449292  | 3       | 29906889               | a               | g               | 0.64                             | 0.22  | 0.10 | 2.53E-02 | 3.50E-02    | 28948   | 0.49  | 0.16 | 2.46E-03 | 3.52E-02    | 28949   | 0.04         | 0.03 | 1.88E-01 | 1.19E-03    | 16865   | RBMS3               | INTRONIC                   | G          | 0.31 | A   | 0.44 |
| rs6802072  | 3       | 41002684               | t               | c               | 0.45                             | -0.42 | 0.09 | 6.17E-06 | 4.26E-01    | 29272.8 | -0.43 | 0.16 | 6.17E-03 | 6.68E-01    | 29273.8 | 0.00         | 0.04 | 9.81E-01 | 2.29E-01    | 11035.8 | N/A                 | INTERGENIC                 | T          | 0.34 | C   | 0.07 |
| rs1717027  | 3       | 41962924               | t               | c               | 0.64                             | 0.49  | 0.10 | 5.07E-07 | 2.51E-01    | 29321.9 | 0.18  | 0.16 | 2.64E-01 | 5.04E-01    | 29322.9 | 0.05         | 0.02 | 1.15E-02 | 4.36E-02    | 29462.9 | ULK4<br>CACNA1<br>D | INTRONIC                   | C          | 0.30 | T   | 0.22 |
| rs10049492 | 3       | 53571572               | a               | g               | 0.74                             | 0.58  | 0.12 | 1.78E-06 | 5.07E-01    | 27878.9 | 0.86  | 0.20 | 1.74E-05 | 9.94E-02    | 27879.9 | 0.14         | 0.03 | 4.88E-07 | 1.40E-01    | 26184.8 | N/A                 | INTERGENIC                 | G          | 0.08 | G   | 0.45 |
| rs7655423  | 4       | 11213208               | t               | c               | 0.51                             | -0.15 | 0.09 | 1.19E-01 | 2.98E-01    | 28955   | -0.69 | 0.16 | 9.94E-06 | 4.62E-01    | 28956   | -0.05        | 0.02 | 1.06E-02 | 9.87E-01    | 27175   | N/A                 | INTERGENIC                 | T          | 0.40 | C   | 0.03 |
| rs7676999  | 4       | 11715352               | t               | c               | 0.10                             | -0.90 | 0.20 | 4.62E-06 | 8.18E-01    | 28933.7 | -1.33 | 0.33 | 5.48E-05 | 6.14E-01    | 28934.7 | -0.15        | 0.04 | 9.20E-04 | 7.17E-01    | 26173.7 | N/A                 | INTERGENIC                 | T          | 0.03 | T   | 0.26 |
| rs4383597  | 4       | 14822511               | a               | g               | 0.51                             | -0.30 | 0.09 | 9.89E-04 | 7.23E-01    | 28944   | -0.73 | 0.15 | 2.04E-06 | 8.76E-01    | 28945   | -0.03        | 0.04 | 5.19E-01 | 3.19E-01    | 8747    | N/A                 | INTERGENIC                 | G          | 0.41 | A   | 0.44 |
| rs12374234 | 4       | 15006115               | t               | c               | 0.25                             | 0.48  | 0.11 | 8.85E-06 | 2.73E-01    | 28938   | 0.55  | 0.18 | 2.33E-03 | 5.49E-02    | 28939   | 0.06         | 0.02 | 2.10E-02 | 1.70E-01    | 27157   | N/A                 | INTERGENIC                 | T          | 0.21 | C   | 0.49 |
| rs3828634  | 5       | 31496959               | t               | c               | 0.23                             | 0.46  | 0.11 | 3.80E-05 | 8.80E-01    | 29131.8 | 0.88  | 0.19 | 2.81E-06 | 6.69E-01    | 29132.8 | 0.00         | 0.05 | 9.96E-01 | 4.62E-01    | 10862.8 | RNASEN              | INTRONIC                   | T          | 0.11 | C   | 0.32 |
| rs11963288 | 6       | 56443263               | t               | c               | 0.95                             | 0.20  | 0.21 | 3.32E-01 | 2.88E-01    | 27373   | 1.55  | 0.35 | 9.73E-06 | 3.54E-01    | 27375   | 0.18         | 0.05 | 1.36E-04 | 7.19E-01    | 27877   | DST                 | INTRONIC                   | C          | 0.03 | C   | 0.03 |
| rs6924906  | 6       | 82277271               | t               | c               | 0.71                             | -0.51 | 0.10 | 5.57E-07 | 5.93E-01    | 29111   | -0.41 | 0.17 | 1.74E-02 | 7.68E-01    | 29112   | -0.02        | 0.04 | 5.22E-01 | 7.57E-01    | 10860   | N/A                 | INTERGENIC                 | C          | 0.32 | C   | 0.07 |
| rs13209747 | 6       | 12715714               | t               | c               | 0.17                             | 0.56  | 0.12 | 8.84E-06 | 4.71E-01    | 28708   | 0.85  | 0.21 | 5.88E-05 | 6.10E-01    | 28709   | 0.04         | 0.05 | 3.25E-01 | 5.70E-01    | 12312   | N/A                 | INTERGENIC                 | T          | 0.13 | T   | 0.46 |
| rs17080102 | 6       | 15104646               | c               | g               | 0.10                             | -0.74 | 0.15 | 5.45E-07 | 6.85E-01    | 29323   | -1.02 | 0.25 | 3.42E-05 | 8.21E-01    | 29324   | -0.10        | 0.03 | 1.32E-03 | 5.86E-02    | 29464   | PLEKHG1             | INTRONIC<br>DOWNSTREA<br>M | C          | 0.11 | C   | 0.05 |
| rs17471520 | 7       | 27145315               | t               | c               | 0.69                             | -0.50 | 0.10 | 1.81E-06 | 6.04E-01    | 29232.7 | -0.88 | 0.17 | 4.39E-07 | 9.54E-01    | 29233.7 | -0.10        | 0.02 | 3.97E-06 | 9.92E-01    | 29373.7 | N/A                 | INTERGENIC                 | C          | 0.34 | C   | 0.11 |
| rs11564022 | 7       | 27303571               | t               | c               | 0.23                             | -0.60 | 0.11 | 7.66E-08 | 7.95E-01    | 29321.9 | -0.89 | 0.19 | 1.83E-06 | 4.99E-01    | 29322.9 | -0.13        | 0.02 | 6.78E-08 | 1.46E-01    | 29462.9 | N/A                 | INTERGENIC                 | T          | 0.18 | T   | 0.42 |
| rs17428471 | 7       | 27304392               | t               | g               | 0.12                             | 0.61  | 0.14 | 1.23E-05 | 7.76E-01    | 29325.9 | 1.20  | 0.24 | 4.00E-07 | 7.48E-01    | 29326.9 | 0.15         | 0.03 | 1.32E-06 | 4.76E-01    | 29834.9 | N/A                 | INTERGENIC                 | T          | 0.14 | T   | 0.06 |
| rs11972761 | 7       | 52858144               | c               | g               | 0.15                             | 0.40  | 0.13 | 1.71E-03 | 6.99E-01    | 29321   | 1.09  | 0.22 | 5.39E-07 | 5.32E-01    | 29322   | 0.07         | 0.03 | 1.52E-02 | 7.66E-01    | 29830   | N/A                 | INTERGENIC                 | C          | 0.19 | C   | 0.03 |
| rs12718983 | 7       | 55692246               | t               | g               | 0.85                             | 0.39  | 0.14 | 4.58E-03 | 6.79E-01    | 29294.8 | 1.10  | 0.23 | 1.46E-06 | 8.48E-01    | 29295.8 | 0.06         | 0.03 | 3.81E-02 | 1.57E-01    | 29435.8 | N/A                 | INTERGENIC                 | G          | 0.10 | G   | 0.42 |

|            |    |                      |   |   |      |       |      |          |          |         |       |      |          |          |         |       |      |          |          |         |                     |            |   |      |   |                 |
|------------|----|----------------------|---|---|------|-------|------|----------|----------|---------|-------|------|----------|----------|---------|-------|------|----------|----------|---------|---------------------|------------|---|------|---|-----------------|
| rs11768155 | 7  | 80203792<br>10703468 | a | g | 0.75 | -0.48 | 0.11 | 5.40E-06 | 4.09E-01 | 29072.7 | -0.41 | 0.18 | 2.13E-02 | 2.08E-01 | 29073.7 | -0.12 | 0.04 | 2.87E-03 | 4.00E-01 | 10851.7 | N/A                 | INTERGENIC | G | 0.37 | G | 0.02            |
| rs6997487  | 8  | 7                    | a | c | 0.27 | -0.48 | 0.11 | 5.62E-06 | 6.28E-01 | 29303   | -0.31 | 0.18 | 8.37E-02 | 2.09E-01 | 29304   | -0.04 | 0.02 | 8.92E-02 | 3.49E-01 | 27546   | N/A                 | INTERGENIC | A | 0.20 | A | 0.50            |
| rs12339156 | 9  | 35905230             | c | g | 0.17 | -0.56 | 0.12 | 7.73E-06 | 7.32E-01 | 29304.9 | -0.61 | 0.21 | 3.30E-03 | 1.55E-01 | 29305.9 | -0.07 | 0.03 | 1.42E-02 | 5.42E-01 | 29813.9 | N/A                 | INTERGENIC | C | 0.20 | C | 0.28            |
| rs7868945  | 9  | 72704778<br>10523422 | a | g | 0.24 | 0.50  | 0.11 | 9.70E-06 | 7.42E-01 | 28881   | 0.53  | 0.19 | 5.84E-03 | 4.68E-01 | 28882   | 0.07  | 0.03 | 9.39E-03 | 6.19E-01 | 27126   | TRPM3               | INTRONIC   | A | 0.30 | A | 0.08            |
| rs4918017  | 10 | 1                    | c | g | 0.73 | 0.53  | 0.12 | 7.31E-06 | 6.08E-01 | 28308.9 | 0.48  | 0.20 | 1.45E-02 | 8.29E-01 | 28309.9 | 0.05  | 0.03 | 3.24E-02 | 8.79E-01 | 28818.8 | N/A                 | INTERGENIC | G | 0.06 | C | 0.33            |
| rs11041530 | 11 | 7658079              | c | g | 0.11 | -0.54 | 0.15 | 2.65E-04 | 9.21E-01 | 29173.9 | -1.35 | 0.25 | 4.04E-08 | 3.45E-01 | 29174.9 | -0.08 | 0.05 | 1.50E-01 | 4.66E-01 | 11002.9 | N/A                 | INTERGENIC | C | 0.09 | C | 0.01            |
| rs16932474 | 11 | 16008731             | t | c | 0.83 | -0.55 | 0.12 | 5.61E-06 | 7.12E-01 | 29313   | -0.49 | 0.20 | 1.70E-02 | 1.89E-02 | 29314   | -0.07 | 0.03 | 1.37E-02 | 9.29E-01 | 27557   | SOX6                | INTRONIC   | C | 0.28 |   | monomorphi<br>c |
| rs1401454  | 11 | 16206759             | t | c | 0.46 | 0.45  | 0.10 | 2.11E-06 | 8.70E-01 | 27939   | 0.55  | 0.16 | 5.68E-04 | 8.25E-01 | 27940   | 0.05  | 0.02 | 1.10E-02 | 8.96E-01 | 26185   | SOX6                | INTRONIC   | C | 0.47 | T | 0.48            |
| rs17142803 | 11 | 81104083             | t | c | 0.10 | 0.98  | 0.22 | 7.53E-06 | 6.24E-01 | 15897   | 0.58  | 0.35 | 9.60E-02 | 8.69E-01 | 15894   | 0.07  | 0.05 | 1.72E-01 | 6.68E-01 | 14161   | N/A                 | INTERGENIC | T | 0.13 |   | monomorphi<br>c |
| rs12311091 | 12 | 19872394<br>13013984 | t | c | 0.20 | -0.21 | 0.12 | 7.23E-02 | 1.71E-01 | 28308.9 | -0.99 | 0.20 | 4.69E-07 | 8.22E-01 | 28309.9 | -0.08 | 0.03 | 1.21E-03 | 1.98E-01 | 28818.9 | N/A                 | INTERGENIC | T | 0.22 | T | 0.17            |
| rs10848279 | 12 | 4<br>10978255        | a | c | 0.10 | -0.53 | 0.16 | 7.25E-04 | 6.15E-01 | 29131   | -1.33 | 0.27 | 6.18E-07 | 7.89E-01 | 29132   | -0.05 | 0.06 | 4.38E-01 | 6.30E-01 | 12691   | GPR133              | INTRONIC   | A | 0.05 | A | 0.23            |
| rs9555689  | 13 | 9                    | a | g | 0.67 | 0.20  | 0.10 | 4.87E-02 | 1.13E-02 | 28308.9 | 0.61  | 0.17 | 5.21E-04 | 5.12E-02 | 28309.9 | 0.08  | 0.02 | 8.08E-04 | 7.12E-02 | 27822.9 | COL4A2              | INTRONIC   | G | 0.42 | G | 0.22            |
| rs6575454  | 14 | 94215314             | t | g | 0.14 | -0.29 | 0.13 | 2.72E-02 | 1.56E-01 | 28661   | -0.54 | 0.22 | 1.68E-02 | 2.78E-02 | 28662   | -0.10 | 0.05 | 3.25E-02 | 3.00E-04 | 11335   | N/A                 | INTERGENIC | T | 0.19 | T | 0.20            |
| rs11633456 | 15 | 62835692             | t | c | 0.32 | 0.34  | 0.10 | 6.65E-04 | 6.12E-01 | 28308.9 | 0.76  | 0.17 | 5.45E-06 | 8.71E-01 | 28310   | 0.07  | 0.02 | 9.41E-04 | 7.56E-01 | 28818.9 | RBPM52              | INTRONIC   | T | 0.36 | T | 0.04            |
| rs467649   | 16 | 64392242             | t | g | 0.02 | 0.74  | 0.31 | 1.88E-02 | 4.52E-01 | 26887   | 2.41  | 0.52 | 4.43E-06 | 9.21E-01 | 26889   | 0.05  | 0.08 | 5.19E-01 | 3.61E-01 | 26423   | N/A                 | INTERGENIC | T | 0.02 | T | 0.09            |
| rs16958138 | 17 | 52697608             | a | g | 0.25 | 0.24  | 0.12 | 3.74E-02 | 7.24E-01 | 28308.9 | 0.90  | 0.19 | 3.14E-06 | 5.86E-01 | 28309.9 | 0.08  | 0.03 | 1.72E-03 | 2.33E-02 | 28818.9 | MSI2<br>BRUNOL<br>4 | INTRONIC   | A | 0.25 | A | 0.05            |
| rs1786784  | 18 | 33252486             | a | g | 0.31 | -0.19 | 0.15 | 2.09E-01 | 1.79E-02 | 13840   | -0.14 | 0.24 | 5.58E-01 | 3.11E-03 | 13838   | -0.10 | 0.03 | 1.43E-03 | 2.19E-02 | 14343   |                     | INTRONIC   | A | 0.44 | A | monomorphi<br>c |
| rs11084566 | 19 | 36049889             | t | c | 0.71 | 0.47  | 0.10 | 5.13E-06 | 3.00E-01 | 28720   | 0.62  | 0.17 | 2.80E-04 | 7.27E-01 | 28722   | 0.01  | 0.02 | 5.10E-01 | 1.44E-01 | 26964   | N/A                 | INTERGENIC | C | 0.25 | C | 0.33            |
| rs2064726  | 20 | 50149092             | t | c | 0.47 | -0.24 | 0.09 | 8.23E-03 | 9.58E-01 | 28599   | -0.70 | 0.15 | 6.02E-06 | 9.04E-01 | 28600   | -0.02 | 0.04 | 5.65E-01 | 8.01E-01 | 8576    | ZFP64               | INTRONIC   | C | 0.44 | T | 0.37            |

SNPs association values with  $P < 1.0 \times 10^{-5}$  for SBP, DBP and hypertension (HTN) in the Continental Origins and Genetic Epidemiology Network (COGENT).  
Abbreviations: Chr, chromosome; MAF, minor allele frequency; HetPVal, P for heterogeneity; N/A, not available

**Table S4. Comparison of the number of observed and expected signals in ICBP for the 43 independent SNPs in COGENT with  $P < 1.0 \times 10^{-5}$**

| Significance level | 0.05                 | 0.01                  | 0.001                 | 0.0001                |
|--------------------|----------------------|-----------------------|-----------------------|-----------------------|
| Observed           | 18                   | 14                    | 11                    | 5                     |
| Expected           | 4.5                  | 0.9                   | 0.09                  | 0.009                 |
| P-value            | $2.2 \times 10^{-7}$ | $2.3 \times 10^{-13}$ | $2.3 \times 10^{-20}$ | $3.5 \times 10^{-13}$ |

Comparison observed and expected SBP or DBP signals in the International Consortium for Blood Pressure (ICBP) for 43 independent SNPs in Continental Origins and Genetic Epidemiology Network (COGENT) with  $P < 1.0 \times 10^{-5}$

**Table S5. Statistical power of replicating the SNPs in Table 1 and 2 using African ancestry samples only.**

| <b>SNP</b> | <b>Alleles</b> | <b>Trait</b> | <b>Estimated SNP specific variance</b> | <b>Total sample size in AA available for the SNP</b> | <b>Allele frequency</b> | <b>Sample size required for 80% power at alpha=0.05</b> |
|------------|----------------|--------------|----------------------------------------|------------------------------------------------------|-------------------------|---------------------------------------------------------|
| rs13209747 | T/C            | SBP          | 5.85E-04                               | 8686                                                 | 0.1854                  | 1.65E+04                                                |
|            |                | DBP          | 7.07E-04                               | 8686                                                 | 0.1854                  | 1.36E+04                                                |
| rs17080102 | C/G            | SBP          | 5.56E-04                               | 10070                                                | 0.1016                  | 1.73E+04                                                |
|            |                | DBP          | 8.19E-04                               | 10070                                                | 0.1016                  | 1.18E+04                                                |
| rs6924906  | T/C            | SBP          | 1.98E-04                               | 11770                                                | 0.7145                  | 4.87E+04                                                |
|            |                | DBP          | 8.85E-04                               | 11770                                                | 0.7145                  | 1.09E+04                                                |
| rs17428471 | T/G            | SBP          | 8.99E-04                               | 6650                                                 | 0.1432                  | 1.07E+04                                                |
|            |                | DBP          | 6.70E-04                               | 6650                                                 | 0.1432                  | 1.44E+04                                                |
| rs1717027  | T/C            | SBP          | 4.44E-05                               | 10070                                                | 0.6447                  | 2.17E+05                                                |
|            |                | DBP          | 9.07E-04                               | 10070                                                | 0.6447                  | 1.06E+04                                                |
| rs1401454  | T/C            | SBP          | 4.41E-04                               | 10070                                                | 0.4615                  | 2.18E+04                                                |
|            |                | DBP          | 8.35E-04                               | 10070                                                | 0.4615                  | 1.15E+04                                                |
| rs11041530 | C/G            | SBP          | 1.07E-03                               | 8686                                                 | 0.1134                  | 9000                                                    |
|            |                | DBP          | 4.78E-04                               | 8686                                                 | 0.1134                  | 2.02E+04                                                |

**Table S6. Conditional analysis of SNPs in HOXA locus for SBP and DBP**

| Systolic blood pressure (SBP)  |     |                     |                  |          | COGENT single-SNP meta-analysis |         |        |          | Conditional analysis, LD from 5 CARE studies* |          |          |  |
|--------------------------------|-----|---------------------|------------------|----------|---------------------------------|---------|--------|----------|-----------------------------------------------|----------|----------|--|
| SNP                            | Chr | Position (build 36) | Nearest gene     | Allele 1 | allele frequency                | beta    | se     | pvalue   | beta                                          | se       | pvalue   |  |
| rs11564022                     | 7   | 27303571            | <i>EVX1-HOXA</i> | T        | 0.2256                          | -0.8915 | 0.1868 | 1.83E-06 | -0.88434                                      | 0.185832 | 1.95E-06 |  |
| rs17471520                     | 7   | 27145315            | <i>EVX1-HOXA</i> | T        | 0.6945                          | -0.8786 | 0.1739 | 4.39E-07 | -0.85691                                      | 0.16913  | 4.05E-07 |  |
| rs11564022                     | 7   | 27303571            | <i>EVX1-HOXA</i> | T        | 0.2256                          | -0.8915 | 0.1868 | 1.83E-06 | -0.89508                                      | 0.185545 | 1.41E-06 |  |
| rs17428471                     | 7   | 27304392            | <i>EVX1-HOXA</i> | T        | 0.1225                          | 1.1961  | 0.236  | 4.00E-07 | 1.17406                                       | 0.235888 | 6.45E-07 |  |
| rs17471520                     | 7   | 27145315            | <i>EVX1-HOXA</i> | T        | 0.6945                          | -0.8786 | 0.1739 | 4.39E-07 | -0.8851                                       | 0.172681 | 2.97E-07 |  |
| rs17428471                     | 7   | 27304392            | <i>EVX1-HOXA</i> | T        | 0.1225                          | 1.1961  | 0.236  | 4.00E-07 | 1.19066                                       | 0.241156 | 7.92E-07 |  |
| Diastolic blood pressure (DBP) |     |                     |                  |          | COGENT single-SNP meta-analysis |         |        |          | Conditional analysis, LD from 5 CARE studies* |          |          |  |
| SNP                            | Chr | Position (build 36) | Nearest gene     | Allele 1 | allele frequency                | beta    | se     | pvalue   | beta                                          | se       | pvalue   |  |
| rs11564022                     | 7   | 27303571            | <i>EVX1-HOXA</i> | T        | 0.2256                          | -0.5969 | 0.111  | 7.66E-08 | -0.59355                                      | 0.110236 | 7.27E-08 |  |
| rs17471520                     | 7   | 27145315            | <i>EVX1-HOXA</i> | T        | 0.6945                          | -0.496  | 0.1039 | 1.81E-06 | -0.47971                                      | 0.100524 | 1.82E-06 |  |
| rs11564022                     | 7   | 27303571            | <i>EVX1-HOXA</i> | T        | 0.2256                          | -0.5969 | 0.111  | 7.66E-08 | -0.59901                                      | 0.110113 | 5.33E-08 |  |
| rs17428471                     | 7   | 27304392            | <i>EVX1-HOXA</i> | T        | 0.1225                          | 0.6143  | 0.1405 | 1.23E-05 | 0.589174                                      | 0.140037 | 2.58E-05 |  |
| rs17471520                     | 7   | 27145315            | <i>EVX1-HOXA</i> | T        | 0.6945                          | -0.496  | 0.1039 | 1.81E-06 | -0.49819                                      | 0.103024 | 1.33E-06 |  |
| rs17428471                     | 7   | 27304392            | <i>EVX1-HOXA</i> | T        | 0.1225                          | 0.6143  | 0.1405 | 1.23E-05 | 0.609722                                      | 0.143636 | 2.19E-05 |  |

Conditional analysis of SNPs in the HOXA region performed for systolic blood pressure (SBP) and diastolic blood pressure (DBP) in the Continental Origins and Genetic Epidemiology Network (COGENT). \*Estimates and p-values

Abbreviations: Chr, chromosome; LD, linkage disequilibrium; SNP, single nucleotide polymorphism



**Table S7. Heterogeneity P-values for the top SNPs in main text Table 1**

| Chr | SNP        | Effect<br>Other Allele | Effect<br>Allele Freq | Trait | Replication P        |                            |                       |                             |                             | Phase III+replication          | All African<br>P            | All African<br>P <sub>HET</sub> | All samples<br>P <sub>HET</sub> |
|-----|------------|------------------------|-----------------------|-------|----------------------|----------------------------|-----------------------|-----------------------------|-----------------------------|--------------------------------|-----------------------------|---------------------------------|---------------------------------|
|     |            |                        |                       |       | COGENT<br>P          | COGENT<br>P <sub>HET</sub> | ICBP<br>P             | African<br>Ancestry         | East<br>Asian               |                                |                             |                                 |                                 |
| 3   | rs1717027  | T/C                    | 0.64                  | SBP   | 2.6x10 <sup>-1</sup> | 0.5                        | 5.0x10 <sup>-1</sup>  | 6.0x10 <sup>-1</sup>        | 5.6x10 <sup>-1</sup>        | 3.00x10 <sup>-1</sup>          | 0.218                       | 0.3577                          | 0.4657                          |
|     |            |                        |                       | DBP   | 5.1x10 <sup>-7</sup> | 0.25                       | 2.5x10 <sup>-7</sup>  | <b>2.2x10<sup>-2</sup></b>  | 1.5x10 <sup>-1</sup>        | <b>4.62x10<sup>-13**</sup></b> | <b>3.40x10<sup>-8</sup></b> | <b>0.9375</b>                   | 0.6815                          |
| 6   | rs6924906  | T/C                    | 0.71                  | SBP   | 1.7x10 <sup>-2</sup> | 0.77                       | 5.6x10 <sup>-4</sup>  | 4.7x10 <sup>-1</sup>        | 2.0x10 <sup>-3*</sup>       | 6.16x10 <sup>-5</sup>          | 9.61x10 <sup>-2</sup>       | 0.2483                          | 0.07095                         |
|     |            |                        |                       | DBP   | 5.6x10 <sup>-7</sup> | 0.59                       | 4.9x10 <sup>-2</sup>  | 9.8x10 <sup>-1</sup>        | 8.8x10 <sup>-3</sup>        | 5.50x10 <sup>-7</sup>          | 1.31x10 <sup>-5</sup>       | 0.2013                          | 0.215                           |
| 6   | rs13209747 | T/C                    | 0.19                  | SBP   | 5.9x10 <sup>-5</sup> | 0.61                       | 5.4x10 <sup>-4</sup>  | <b>5.0x10<sup>-4*</sup></b> | <b>2.6x10<sup>-3*</sup></b> | <b>2.56x10<sup>-10**</sup></b> | 3.32x10 <sup>-7</sup>       | <b>0.366</b>                    | 0.1698                          |
|     |            |                        |                       | DBP   | 8.8x10 <sup>-6</sup> | 0.47                       | 1.5x10 <sup>-3</sup>  | <b>2.2x10<sup>-2</sup></b>  | <b>1.2x10<sup>-4*</sup></b> | <b>2.43x10<sup>-11**</sup></b> | 6.37x10 <sup>-7</sup>       | <b>0.2151</b>                   | 0.2296                          |
| 6   | rs17080102 | C/G                    | 0.1                   | SBP   | 3.4x10 <sup>-5</sup> | 0.82                       | 9.2x10 <sup>-4</sup>  | 2.3x10 <sup>-1</sup>        | 3.4x10 <sup>-2</sup>        | 4.75x10 <sup>-8</sup>          | 2.54x10 <sup>-5</sup>       | 0.7246                          | 0.8165                          |
|     |            |                        |                       | DBP   | 5.4x10 <sup>-7</sup> | 0.69                       | 1.5x10 <sup>-4</sup>  | 4.1x10 <sup>-1</sup>        | 8.5x10 <sup>-4*</sup>       | 1.90x10 <sup>-11**</sup>       | 1.15x10 <sup>-6</sup>       | 0.294                           | 0.3656                          |
| 7   | rs17428471 | T/G                    | 0.14                  | SBP   | 4.0x10 <sup>-7</sup> | 0.75                       | 8.0x10 <sup>-6*</sup> | 1.4x10 <sup>-4*</sup>       | 3.4x10 <sup>-1</sup>        | 2.1x10 <sup>-12**</sup>        | 9.15x10 <sup>-10</sup>      | 0.2651                          | 0.07015                         |
|     |            |                        |                       | DBP   | 1.2x10 <sup>-5</sup> | 0.78                       | 2.8x10 <sup>-5*</sup> | 1.1x10 <sup>-2</sup>        | 4.4x10 <sup>-1</sup>        | 1.6x10 <sup>-9**</sup>         | 7.07x10 <sup>-7</sup>       | 0.7819                          | 0.4949                          |
| 11  | rs1401454  | T/C                    | 0.46                  | SBP   | 5.7x10 <sup>-4</sup> | 0.83                       | 2.2x10 <sup>-4</sup>  | 9.7x10 <sup>-4*</sup>       | 6.7x10 <sup>-1</sup>        | 9.50x10 <sup>-7</sup>          | 3.79x10 <sup>-6</sup>       | 0.4655                          | 0.05645                         |
|     |            |                        |                       | DBP   | 2.1x10 <sup>-6</sup> | 0.87                       | 3.1x10 <sup>-5</sup>  | 5.0x10 <sup>-3</sup>        | 5.5x10 <sup>-1</sup>        | 5.12x10 <sup>-10**</sup>       | 3.82x10 <sup>-8</sup>       | 0.5955                          | 0.1655                          |
| 11  | rs11041530 | C/G                    | 0.11                  | SBP   | 4.0x10 <sup>-8</sup> | 0.34                       | 2.9x10 <sup>-2</sup>  | 8.0x10 <sup>-1</sup>        | 9.3x10 <sup>-1</sup>        | 5.6x10 <sup>-6</sup>           | 2.89x10 <sup>-6</sup>       | 0.03584                         | 0.02305                         |
|     |            |                        |                       | DBP   | 2.6x10 <sup>-4</sup> | 0.47                       | 0.119                 | 6.5x10 <sup>-1</sup>        | 6.6x10 <sup>-1</sup>        | 7.6x10 <sup>-4</sup>           | 2.30x10 <sup>-3</sup>       | 0.1446                          | 0.2073                          |

Abbreviations: SNP, single nucleotide polymorphisms; PHET, p for heterogeneity

**Table S8. Conditional analysis of SNPs in SOX6 for SBP and DBP**

**Systolic blood pressure (SBP)**

|           |     |                     |              |          |                  |        |        |          |          |          | COGENT single-SNP meta-analysis |  |  | Conditional analysis, LD from 5 CARE studies* |  |  |
|-----------|-----|---------------------|--------------|----------|------------------|--------|--------|----------|----------|----------|---------------------------------|--|--|-----------------------------------------------|--|--|
| SNP       | Chr | Position (build 36) | Nearest gene | Allele 1 | allele frequency | beta   | se     | pvalue   | beta     | se       | pvalue                          |  |  |                                               |  |  |
| rs1401454 | 11  | 16206759            | SOX6         | T        | 0.46             | 0.5512 | 0.1599 | 5.68E-04 | 0.550958 | 0.158859 | 5.24E-04                        |  |  |                                               |  |  |
| rs381815  | 11  | 16858844            | SOX6         | T        | 0.2225           | 0.2765 | 0.1886 | 0.1427   | 0.301567 | 0.190844 | 1.14E-01                        |  |  |                                               |  |  |
| rs1401454 | 11  | 16206759            | SOX6         | T        | 0.46             | 0.5512 | 0.1599 | 5.68E-04 | 0.528509 | 0.159365 | 9.12E-04                        |  |  |                                               |  |  |
| rs2014408 | 11  | 16321858            | SOX6         | T        | 0.0718           | 0.5363 | 0.3106 | 0.08423  | 0.527856 | 0.307876 | 8.64E-02                        |  |  |                                               |  |  |

**Diastolic blood pressure (DBP)**

|           |     |                     |              |          |                  |        |        |          |          |          | COGENT single-SNP meta-analysis |  |  | Conditional analysis, LD from 5 CARE cohorts* |  |  |
|-----------|-----|---------------------|--------------|----------|------------------|--------|--------|----------|----------|----------|---------------------------------|--|--|-----------------------------------------------|--|--|
| SNP       | Chr | Position (build 36) | Nearest gene | Allele 1 | allele frequency | beta   | se     | pvalue   | beta     | se       | pvalue                          |  |  |                                               |  |  |
| rs1401454 | 11  | 16206759            | SOX6         | T        | 0.46             | 0.451  | 0.0951 | 2.11E-06 | 0.450111 | 0.094335 | 1.83E-06                        |  |  |                                               |  |  |
| rs381815  | 11  | 16858844            | SOX6         | T        | 0.2225           | 0.2517 | 0.1122 | 0.0249   | 0.303716 | 0.113146 | 7.27E-03                        |  |  |                                               |  |  |
| rs1401454 | 11  | 16206759            | SOX6         | T        | 0.46             | 0.451  | 0.0951 | 2.11E-06 | 0.434742 | 0.094648 | 4.36E-06                        |  |  |                                               |  |  |
| rs2014408 | 11  | 16321858            | SOX6         | T        | 0.0718           | 0.3731 | 0.1873 | 0.04636  | 0.388407 | 0.184351 | 3.51E-02                        |  |  |                                               |  |  |

\*Conditional analysis estimates and p-values were obtained when using two SNPs (marked in the same color) in a linear regression models

We performed conditional analysis using summary statistics methods previously described by Yang et al (2012, Nat Genet) for SBP and DBP signals in the NHLBI Candidate gene Association Resource (CARE) GWAS data using rs1401454, rs381815, rs2014408 from the SOX6 locus. The CARE cohorts used were as follows: Atherosclerosis Risk In Communities (ARIC); Coronary Artery Risk Development in Young Adults (CARDIA); Cleveland Family Study (CFS); Jackson Heart Study (JHS); Multi-Ethnic Study of Atherosclerosis (MESA).

**Table S9. Replication analysis in COGENT of 29 identified SNPs by ICBP**

| trait | Chr   | Position (build 36) | SNP        | Nearby gene      | Coded Allele | Other allele | Allele frequencies |          |       |       |       | COGENT Results |        |          |
|-------|-------|---------------------|------------|------------------|--------------|--------------|--------------------|----------|-------|-------|-------|----------------|--------|----------|
|       |       |                     |            |                  |              |              | EUR                | AA       | Asia  | YRI   | CEU   | Beta           | SE     | pvalue   |
| DBP   | chr12 | 113872179           | rs10850411 | <i>TBX5-TBX3</i> | T            | C            | 0.70               | 0.657782 | 0.408 | 0.653 | 0.683 | -0.0087        | 0.1052 | 0.9344   |
| SBP   | chr12 | 113872179           | rs10850411 | <i>TBX5-TBX3</i> | T            | C            | 0.70               | 0.657782 | 0.408 | 0.653 | 0.683 | -0.114         | 0.1748 | 0.5142   |
| DBP   | chr10 | 104836168           | rs11191548 | <i>CYP17A1</i>   | T            | C            | 0.91               | 0.950721 | 0.808 |       | 0.917 | 0.2967         | 0.2065 | 0.1507   |
| SBP   | chr10 | 104836168           | rs11191548 | <i>CYP17A1</i>   | T            | C            | 0.91               | 0.950721 | 0.808 |       | 0.917 | 0.9017         | 0.3457 | 0.009086 |
| DBP   | chr5  | 32850785            | rs1173771  | <i>NPR3-</i>     | G            | A            | 0.60               | 0.772235 | 0.658 | 0.805 | 0.525 | -0.0741        | 0.109  | 0.4966   |
| SBP   | chr5  | 32850785            | rs1173771  | <i>NPR3-</i>     | G            | A            | 0.60               | 0.772235 | 0.658 | 0.805 | 0.525 | 0.0369         | 0.1824 | 0.8397   |
| DBP   | chr5  | 157777980           | rs11953630 | <i>EBF1</i>      | T            | C            | 0.37               | 0.185074 | 0.058 | 0.127 | 0.342 | -0.3209        | 0.1188 | 0.0069   |
| SBP   | chr5  | 157777980           | rs11953630 | <i>EBF1</i>      | T            | C            | 0.37               | 0.185074 | 0.058 | 0.127 | 0.342 | -0.4194        | 0.1992 | 0.03523  |
| DBP   | chr17 | 44757806            | rs12940887 | <i>ZNF652</i>    | T            | C            | 0.38               | 0.103031 | 0.1   | 0.008 | 0.375 | 0.0985         | 0.1491 | 0.5089   |
| SBP   | chr17 | 44757806            | rs12940887 | <i>ZNF652</i>    | T            | C            | 0.38               | 0.103031 | 0.1   | 0.008 | 0.375 | 0.4184         | 0.2501 | 0.0944   |
| DBP   | chr3  | 27512913            | rs13082711 | <i>SLC4A7</i>    | T            | C            | 0.78               | 0.925671 | 0.942 | 0.958 | 0.775 | -0.3236        | 0.1775 | 0.06822  |
| SBP   | chr3  | 27512913            | rs13082711 | <i>SLC4A7</i>    | T            | C            | 0.78               | 0.925671 | 0.942 | 0.958 | 0.775 | -0.2767        | 0.2988 | 0.3544   |
| DBP   | chr4  | 103407732           | rs13107325 | <i>SLC39A8</i>   | T            | C            | 0.05               | 0.018869 |       |       | 0.092 | -1.1784        | 0.5385 | 0.02865  |
| SBP   | chr4  | 103407732           | rs13107325 | <i>SLC39A8</i>   | T            | C            | 0.05               | 0.018869 |       |       | 0.092 | -1.589         | 0.8346 | 0.05692  |
| DBP   | chr4  | 156864963           | rs13139571 | <i>GUCY1A3-</i>  | C            | A            | 0.76               | 0.839506 | 0.733 | 0.915 | 0.717 | 0.0889         | 0.1298 | 0.4933   |
| SBP   | chr4  | 156864963           | rs13139571 | <i>GUCY1A3-</i>  | C            | A            | 0.76               | 0.839506 | 0.733 | 0.915 | 0.717 | -0.0929        | 0.2169 | 0.6684   |
| DBP   | chr20 | 10917030            | rs1327235  | <i>JAG1</i>      | G            | A            | 0.46               | 0.506287 | 0.492 | 0.551 | 0.508 | 0.2137         | 0.0919 | 0.0201   |
| SBP   | chr20 | 10917030            | rs1327235  | <i>JAG1</i>      | G            | A            | 0.46               | 0.506287 | 0.492 | 0.551 | 0.508 | 0.4864         | 0.1543 | 0.001621 |
| DBP   | chr15 | 72864420            | rs1378942  | <i>CYP1A1-</i>   | C            | A            | 0.35               | 0.882267 | 0.808 |       | 0.3   | -0.2289        | 0.1472 | 0.12     |
| SBP   | chr15 | 72864420            | rs1378942  | <i>CYP1A1-</i>   | C            | A            | 0.35               | 0.882267 | 0.808 |       | 0.3   | -0.042         | 0.2482 | 0.8655   |
| DBP   | chr4  | 81383747            | rs1458038  | <i>FGF5</i>      | T            | C            | 0.29               | 0.087862 | 0.283 | 0.059 | 0.267 | 0.5318         | 0.1821 | 0.003494 |
| SBP   | chr4  | 81383747            | rs1458038  | <i>FGF5</i>      | T            | C            | 0.29               | 0.087862 | 0.283 | 0.059 | 0.267 | 0.4195         | 0.305  | 0.169    |
| DBP   | chr12 | 88584717            | rs17249754 | <i>ATP2B1</i>    | G            | A            | 0.84               | 0.865644 | 0.667 | 0.873 | 0.9   | 0.039          | 0.1378 | 0.7773   |
| SBP   | chr12 | 88584717            | rs17249754 | <i>ATP2B1</i>    | G            | A            | 0.84               | 0.865644 | 0.667 | 0.873 | 0.9   | 0.5724         | 0.2306 | 0.01306  |
| DBP   | chr1  | 11785365            | rs17367504 | <i>MTHFR-</i>    | G            | A            | 0.15               | 0.108908 | 0.108 | 0.085 | 0.183 | -0.0199        | 0.1465 | 0.8922   |
| SBP   | chr1  | 11785365            | rs17367504 | <i>MTHFR-</i>    | G            | A            | 0.15               | 0.108908 | 0.108 | 0.085 | 0.183 | -0.2578        | 0.2472 | 0.2971   |
| DBP   | chr17 | 42368270            | rs17608766 | <i>GOSR2</i>     | T            | C            | 0.86               | 0.972944 |       |       | 0.908 | 0.0986         | 0.3985 | 0.8046   |
| SBP   | chr17 | 42368270            | rs17608766 | <i>GOSR2</i>     | T            | C            | 0.86               | 0.972944 |       |       | 0.908 | -0.4198        | 0.6375 | 0.5102   |

|     |       |           |           |                   |   |   |      |          |       |       |       |         |          |          |          |
|-----|-------|-----------|-----------|-------------------|---|---|------|----------|-------|-------|-------|---------|----------|----------|----------|
| DBP | chr6  | 26199158  | rs1799945 | <i>HFE</i>        | G | C | 0.14 | 0.028593 |       |       |       |         | 0.3771   | 0.3892   | 0.3326   |
| SBP | chr6  | 26199158  | rs1799945 | <i>HFE</i>        | G | C | 0.14 | 0.028593 |       |       |       |         | 0.3962   | 0.6193   | 0.5223   |
| DBP | chr10 | 18747454  | rs1813353 | <i>CACNB2(39)</i> | T | C | 0.68 | 0.872536 | 0.833 | 0.856 | 0.633 | -0.0392 | 0.1241   | 0.7523   |          |
| SBP | chr10 | 18747454  | rs1813353 | <i>CACNB2(39)</i> | T | C | 0.68 | 0.872536 | 0.833 | 0.856 | 0.633 | 0.3615  | 0.2072   | 0.08101  |          |
| DBP | chr15 | 89238392  | rs2521501 | <i>FURIN-FES</i>  | T | A | 0.31 | 0.269298 | 0.075 | 0.169 | 0.383 | 0.1965  | 0.1276   | 0.1235   |          |
| SBP | chr15 | 89238392  | rs2521501 | <i>FURIN-FES</i>  | T | A | 0.31 | 0.269298 | 0.075 | 0.169 | 0.383 | 0.0656  | 0.2113   | 0.7564   |          |
| DBP | chr1  | 113018066 | rs2932538 | <i>MOV10</i>      | G | A | 0.75 | 0.821123 | 0.842 | 0.831 | 0.7   | 0.3786  | 0.1197   | 0.001561 |          |
| SBP | chr1  | 113018066 | rs2932538 | <i>MOV10</i>      | G | A | 0.75 | 0.821123 | 0.842 | 0.831 | 0.7   | 0.3793  | 0.2008   | 0.05883  |          |
| DBP | chr12 | 110368991 | rs3184504 | <i>SH2B3</i>      | T | C | 0.47 | 0.082043 |       |       |       | 0.45    | 0.5759   | 0.2384   | 0.01571  |
| SBP | chr12 | 110368991 | rs3184504 | <i>SH2B3</i>      | T | C | 0.47 | 0.082043 |       |       |       | 0.45    | 1.29E+00 | 3.70E-01 | 5.05E-04 |
| DBP | chr3  | 41852418  | rs3774372 | <i>ULK4</i>       | T | C | 0.83 | 0.796856 | 0.842 | 0.805 | 0.783 | -0.2336 | 0.1126   | 0.03805  |          |
| SBP | chr3  | 41852418  | rs3774372 | <i>ULK4</i>       | T | C | 0.83 | 0.796856 | 0.842 | 0.805 | 0.783 | -0.1484 | 0.1883   | 0.4305   |          |
| DBP | chr11 | 16858844  | rs381815  | <i>PLEKHA7</i>    | T | C | 0.26 | 0.218154 | 0.175 | 0.203 | 0.317 | 0.2517  | 0.1122   | 0.0249   |          |
| SBP | chr11 | 16858844  | rs381815  | <i>PLEKHA7</i>    | T | C | 0.26 | 0.218154 | 0.175 | 0.203 | 0.317 | 0.2765  | 0.1886   | 0.1427   |          |
| DBP | chr3  | 170583580 | rs419076  | <i>MECOM</i>      | T | C | 0.47 | 0.507554 | 0.133 | 0.593 | 0.467 | 0.0268  | 0.0915   | 0.7699   |          |
| SBP | chr3  | 170583580 | rs419076  | <i>MECOM</i>      | T | C | 0.47 | 0.507554 | 0.133 | 0.593 | 0.467 | 0.1333  | 0.154    | 0.3868   |          |
| DBP | chr10 | 18459978  | rs4373814 | <i>CACNB2(59)</i> | G | C | 0.55 | 0.441108 | 0.508 | 0.415 | 0.667 | -0.2097 | 0.0989   | 0.03399  |          |
| SBP | chr10 | 18459978  | rs4373814 | <i>CACNB2(59)</i> | G | C | 0.55 | 0.441108 | 0.508 | 0.415 | 0.667 | -0.1033 | 0.1661   | 0.5342   |          |
| DBP | chr10 | 63137559  | rs4590817 | <i>C10orf107</i>  | G | C | 0.84 | 0.83826  |       | 0.797 | 0.817 | -0.2224 | 0.1266   | 0.07897  |          |
| SBP | chr10 | 63137559  | rs4590817 | <i>C10orf107</i>  | G | C | 0.84 | 0.83826  |       | 0.797 | 0.817 | 0.1496  | 0.2134   | 0.4833   |          |
| DBP | chr20 | 57184512  | rs6015450 | <i>GNAS-EDN3</i>  | G | A | 0.12 | 0.186073 |       | 0.178 | 0.058 | 0.3083  | 0.1231   | 0.01225  |          |
| SBP | chr20 | 57184512  | rs6015450 | <i>GNAS-EDN3</i>  | G | A | 0.12 | 0.186073 |       | 0.178 | 0.058 | 0.1621  | 0.2059   | 0.4311   |          |
| DBP | chr11 | 100098748 | rs633185  | <i>FLJ32810-</i>  | G | C | 0.28 | 0.210992 | 0.525 | 0.144 | 0.292 | -0.0559 | 0.1164   | 0.6311   |          |
| SBP | chr11 | 100098748 | rs633185  | <i>FLJ32810-</i>  | G | C | 0.28 | 0.210992 | 0.525 | 0.144 | 0.292 | -0.1942 | 0.1937   | 0.3161   |          |
| DBP | chr11 | 10307114  | rs7129220 | <i>ADM</i>        | G | A | 0.89 | 0.927608 |       | 0.941 | 0.883 | -0.3187 | 0.1728   | 0.0651   |          |
| SBP | chr11 | 10307114  | rs7129220 | <i>ADM</i>        | G | A | 0.89 | 0.927608 |       | 0.941 | 0.883 | -0.9915 | 0.2879   | 0.000573 |          |
| DBP | chr6  | 31724345  | rs805303  | <i>BAT2-BAT5</i>  | G | A | 0.61 | 0.401722 |       |       |       | -0.0285 | 0.0945   | 0.7634   |          |
| SBP | chr6  | 31724345  | rs805303  | <i>BAT2-BAT5</i>  | G | A | 0.61 | 0.401722 |       |       |       | 0.095   | 0.1588   | 0.5495   |          |
| DBP | chr10 | 95885930  | rs932764  | <i>PLCE1</i>      | G | A | 0.44 | 0.193873 | 0.542 | 0.195 | 0.425 | -0.1295 | 0.1157   | 0.2627   |          |
| SBP | chr10 | 95885930  | rs932764  | <i>PLCE1</i>      | G | A | 0.44 | 0.193873 | 0.542 | 0.195 | 0.425 | -0.0855 | 0.1944   | 0.6599   |          |

Replication analysis of the 29 genome-wide significant SNPs identified by the International Consortium for Blood Pressure (ICBP) study in the in Continental Origins and Genetic Epidemiology Network (COGENT). Significant associations ( $P < 0.05$ ) are shown in red.

**Table S10. Fine-mapping of four loci identified by ICBP**

| Gene/Chr     | Trait | SNP        | r <sup>2</sup> |       | Alleles<br>(effect/other) | Effect allele<br>frequency<br>(EA, AA) | Position<br>(Build 36) | N      | European ancestry (EA) |          |         | African ancestry (AA) |          |         | Explained<br>variance<br>(%) | Conditional analysis |     | Conditional SNP | HapMap CEU and YRI block sizes (bp) defined by r2>0.7 |
|--------------|-------|------------|----------------|-------|---------------------------|----------------------------------------|------------------------|--------|------------------------|----------|---------|-----------------------|----------|---------|------------------------------|----------------------|-----|-----------------|-------------------------------------------------------|
|              |       |            | EUR            | AFR   |                           |                                        |                        |        | Beta                   | P-value  | N       | Beta (SE)             | P-value  | P-value |                              |                      |     |                 |                                                       |
| EBF1/chr5    | DBP   | rs11953630 | 0.928          | 0.499 | T/C                       | 0.342,0.127                            | 157777980              | 203056 | -0.281                 | 3.80E-13 | 28308.9 | -0.3209(0.1188)       | 0.0069   | 0.0189% | 0.431005                     | rs4551053            | CEU | 75,779          |                                                       |
|              | DBP   | rs4551053  |                |       | A/G                       | 0.325,0.068                            | 157771120              | 203056 |                        | 2.37E-05 | 28309   | -0.4973(0.14)         | 0.000384 | 0.0259% |                              |                      | YRI | 24,249          |                                                       |
|              | SBP   | rs11953630 |                |       | T/C                       | 0.342,0.127                            | 157777980              | 203056 | -0.412                 | 3.00E-11 | 28308.9 | -0.4194(0.1992)       | 0.03523  | 0.0114% | 0.804633                     | rs4551053            |     |                 |                                                       |
|              | SBP   | rs4551053  |                |       | A/G                       | 0.325,0.068                            | 157771120              | 203056 |                        | 2.72E-06 | 28309   | -0.754(0.2321)        | 0.001161 | 0.0211% |                              |                      |     |                 |                                                       |
|              | HTN   | rs11953630 |                |       | T/C                       | 0.342,0.127                            | 157777980              | 203056 | -0.052                 | 1.70E-07 | 28308.9 | -0.0867(0.026)        | 0.000847 | 0.0111% | 0.115087                     | rs4551053            |     |                 |                                                       |
|              | HTN   | rs4551053  |                |       | A/G                       | 0.325,0.068                            | 157771120              | 203056 |                        |          | 28309   | -0.1148(0.0317)       | 0.000296 | 0.0111% |                              |                      |     |                 |                                                       |
| ATP2B1/chr12 | DBP   | rs17249754 | 0.915          | 0.703 | A/G                       | 0.1,0.1298                             | 88584717               | 203056 | 0.522                  | 1.20E-14 | 28925   | -0.039(0.1378)        | 0.7773   | 0.0003% | 0.617033                     | rs2681492            | CEU | 150,233         |                                                       |
|              | DBP   | rs2681492  |                |       | T/C                       | 0.892,0.87                             | 88537220               | 203056 |                        | 6.12E-08 | 29247.9 | 0.0853(0.1403)        | 0.5433   | 0.0014% |                              |                      | YRI | 58,987          |                                                       |
|              | SBP   | rs17249754 |                |       | A/G                       | 0.1,0.1298                             | 88584717               | 203056 | 0.928                  | 1.80E-18 | 28925   | -0.5724(0.2306)       | 0.01306  | 0.0216% | 0.574338                     | rs2681492            |     |                 |                                                       |
|              | SBP   | rs2681492  |                |       | T/C                       | 0.892,0.87                             | 88537220               | 203056 |                        | 2.06E-11 | 29247.9 | 0.745(0.2349)         | 0.001517 | 0.0367% |                              |                      |     |                 |                                                       |
|              | HTN   | rs17249754 |                |       | A/G                       | 0.1,0.1298                             | 88584717               | 203056 | 0.126                  | 1.10E-14 | 28925   | -0.1159(0.0522)       | 0.02642  | 0.0202% | 0.574623                     | rs2681492            |     |                 |                                                       |
|              | HTN   | rs2681492  |                |       | T/C                       | 0.892,0.87                             | 88537220               | 203056 |                        |          | 29247.9 | 0.1034(0.031)         | 0.000855 | 0.0161% |                              |                      |     |                 |                                                       |
| NT5C2/chr10  | DBP   | rs11191548 | 1              | 0.496 | T/C                       | 0.917,0.949                            | 104836168              | 203056 | 0.464                  | 9.40E-13 | 28675   | 0.2967(0.2065)        | 0.1507   | 0.0070% | 0.774123                     | rs11191555           | CEU | 422,828         |                                                       |
|              | DBP   | rs11191555 |                |       | A/C                       | 0.917,0.956                            | 104847513              | 203056 |                        | 3.74E-06 | 27823   | 0.4455(0.2292)        | 0.05192  | 0.0138% |                              |                      | YRI | 400,148         |                                                       |
|              | SBP   | rs11191548 |                |       | T/C                       | 0.917,0.949                            | 104836168              | 203056 | 1.095                  | 6.90E-26 | 28675   | 0.9017(0.3457)        | 0.009086 | 0.0230% | 0.418126                     | rs11191555           |     |                 |                                                       |
|              | SBP   | rs11191555 |                |       | A/C                       | 0.917,0.956                            | 104847513              | 203056 |                        | 9.49E-10 | 27823   | 1.0032(0.3841)        | 0.00901  | 0.0247% |                              |                      |     |                 |                                                       |
|              | HTN   | rs11191548 |                |       | T/C                       | 0.917,0.949                            | 104836168              | 203056 | 0.097                  | 1.40E-05 | 28675   | 0.1199(0.0777)        | 0.1226   | 0.0093% | 0.568881                     | rs11191555           |     |                 |                                                       |
|              | HTN   | rs11191555 |                |       | A/C                       | 0.917,0.956                            | 104847513              | 203056 |                        |          | 27823   | 0.1045(0.0525)        | 0.04634  | 0.0061% |                              |                      |     |                 |                                                       |
| ULK4/chr3    | DBP   | rs3774372  | 1              | 0.098 | T/C                       | 0.783,0.797                            | 41852418               | 203056 | -0.367                 | 9.00E-14 | 29317   | -0.2336(0.1126)       | 0.03805  | 0.0146% | 0.613398                     | rs1716642            | CEU | 314,745         |                                                       |
|              | DBP   | rs1716642  |                |       | A/C                       | 0.783,0.648                            | 41940869               | 203056 |                        | 2.60E-07 | 24185   | 0.5359(0.1084)        | 7.57E-07 | 0.1083% |                              |                      | YRI | 221,195         |                                                       |
|              | SBP   | rs3774372  |                |       | T/C                       | 0.783,0.797                            | 41852418               | 203056 | -0.067                 | 0.39     | 29317   | -0.1484(0.1883)       | 0.4305   | 0.0021% | 0.573685                     | rs1716642            |     |                 |                                                       |
|              | SBP   | rs1716642  |                |       | A/C                       | 0.783,0.648                            | 41940869               | 203056 |                        | 0.497    | 24185   | 0.1424(0.1805)        | 0.4301   | 0.0027% |                              |                      |     |                 |                                                       |
|              | HTN   | rs3774372  |                |       | T/C                       | 0.783,0.797                            | 41852418               | 203056 | -0.017                 | 0.18     | 29317   | 0.0487(0.0476)        | 0.3069   | 0.0051% | 0.0741162                    | rs1716642            |     |                 |                                                       |
|              | HTN   | rs1716642  |                |       | A/C                       | 0.783,0.648                            | 41940869               | 203056 |                        |          | 24185   | 0.0781(0.0238)        | 0.001047 | 0.0186% |                              |                      |     |                 |                                                       |

**Table S11. Cardiotoxicity and associated molecules and p-values from toxicology function analysis of IPA**

| <b>Cardiotoxicity</b>              | <b>Molecules</b> | <b>Pvalue</b>         |
|------------------------------------|------------------|-----------------------|
| Cardiac stenosis                   | <i>HOXA3</i>     | $4.54 \times 10^{-3}$ |
| Congenital heart anomaly           | <i>HOXA3</i>     | $1.31 \times 10^{-2}$ |
| Cardiac congestive cardiac failure | <i>CACNA1D</i>   | $4.16 \times 10^{-2}$ |
| Heart failure                      | <i>CACNA1D</i>   | $4.16 \times 10^{-2}$ |

## References

1. Ritchie, M.D., Denny, J.C., Crawford, D.C., Ramirez, A.H., Weiner, J.B., Pulley, J.M., Basford, M.A., Brown-Gentry, K., Balsler, J.R., Masys, D.R., et al. (2010). Robust replication of genotype-phenotype associations across multiple diseases in an electronic medical record. *Am J Hum Genet* 86, 560-572.
2. Dumitrescu, L., Ritchie, M.D., Brown-Gentry, K., Pulley, J.M., Basford, M., Denny, J.C., Oksenberg, J.R., Roden, D.M., Haines, J.L., and Crawford, D.C. (2010). Assessing the accuracy of observer-reported ancestry in a biorepository linked to electronic medical records. *Genet Med* 12, 648-650.
3. Birdwell, K.A., Grady, B., Choi, L., Xu, H., Bian, A., Denny, J.C., Jiang, M., Vranic, G., Basford, M., Cowan, J.D., et al. (2012). The use of a DNA biobank linked to electronic medical records to characterize pharmacogenomic predictors of tacrolimus dose requirement in kidney transplant recipients. *Pharmacogenet Genomics* 22, 32-42.
4. Delaney, J.T., Ramirez, A.H., Bowton, E., Pulley, J.M., Basford, M.A., Schildcrout, J.S., Shi, Y., Zink, R., Oetjens, M., Xu, H., et al. (2012). Predicting clopidogrel response using DNA samples linked to an electronic health record. *Clin Pharmacol Ther* 91, 257-263.
5. Ramirez, A.H., Shi, Y., Schildcrout, J.S., Delaney, J.T., Xu, H., Oetjens, M.T., Zuvich, R.L., Basford, M.A., Bowton, E., Jiang, M., et al. (2012). Predicting warfarin dosage in European-Americans and African-Americans using DNA samples linked to an electronic health record. *Pharmacogenomics* 13, 407-418.
6. White, C.C., Feng, Q., Cupples, L.A., Gainer, J.V., Dawson, E.P., Wilke, R.A., and Brown, N.J. (2011). CYP4A11 variant is associated with high-density lipoprotein cholesterol in women. *Pharmacogenomics J*.
7. Buyske, S., Wu, Y., Carty, C.L., Cheng, I., Assimes, T.L., Dumitrescu, L., Hindorff, L.A., Mitchell, S., Ambite, J.L., Boerwinkle, E., et al. (2012). Evaluation of the MetaboChip Genotyping Array in African Americans and Implications for Fine Mapping of GWAS-Identified Loci: The PAGE Study. *PLoS One* 7, e35651.
8. Delaney, J.T., Jeff, J.M., Brown, N.J., Pretorius, M., Okafor, H.E., Darbar, D., Roden, D.M., and Crawford, D.C. (2012). Characterization of genome-wide association-identified variants for atrial fibrillation in African Americans. *PLoS One* 7, e32338.
9. Pulley, J., Clayton, E., Bernard, G.R., Roden, D.M., and Masys, D.R. (2010). Principles of human subjects protections applied in an opt-out, de-identified biobank. *Clin Transl Sci* 3, 42-48.
10. Voors, A.W., Foster, T.A., Frerichs, R.R., Webber, L.S., and Berenson, G.S. (1976). Studies of blood pressures in children, ages 5-14 years, in a total biracial community: the Bogalusa Heart Study. *Circulation* 54, 319-327.
11. Smith, E.N., Chen, W., Kahonen, M., Kettunen, J., Lehtimaki, T., Peltonen, L., Raitakari, O.T., Salem, R.M., Schork, N.J., Shaw, M., et al. (2010). Longitudinal genome-wide association of cardiovascular disease risk factors in the Bogalusa heart study. *PLoS genetics* 6.
12. (1989). The Atherosclerosis Risk in Communities (ARIC) Study: design and objectives. The ARIC investigators. *Am J Epidemiol* 129, 687-702.
13. Friedman, G.D., Cutter, G.R., Donahue, R.P., Hughes, G.H., Hulley, S.B., Jacobs, D.R., Jr., Liu, K., and Savage, P.J. (1988). CARDIA: study design, recruitment, and some characteristics of the examined subjects. *J Clin Epidemiol* 41, 1105-1116.
14. Palmer, L.J., Buxbaum, S.G., Larkin, E., Patel, S.R., Elston, R.C., Tishler, P.V., and Redline, S. (2003). A whole-genome scan for obstructive sleep apnea and obesity. *American journal of human genetics* 72, 340-350.
15. Taylor, H.A., Jr. (2005). The Jackson Heart Study: an overview. *Ethn Dis* 15, S6-1-3.
16. Fuqua, S.R., Wyatt, S.B., Andrew, M.E., Sarpong, D.F., Henderson, F.R., Cunningham, M.F., and Taylor, H.A., Jr. (2005). Recruiting African-American research participation in the Jackson Heart Study: methods, response rates, and sample description. *Ethn Dis* 15, S6-18-29.
17. Bild, D.E., Bluemke, D.A., Burke, G.L., Detrano, R., Diez Roux, A.V., Folsom, A.R., Greenland, P., Jacob, D.R., Jr., Kronmal, R., Liu, K., et al. (2002). Multi-ethnic study of atherosclerosis: objectives and design. *Am J Epidemiol* 156, 871-881.

18. Fried, L.P., Borhani, N.O., Enright, P., Furberg, C.D., Gardin, J.M., Kronmal, R.A., Kuller, L.H., Manolio, T.A., Mittelmark, M.B., Newman, A., et al. (1991). The Cardiovascular Health Study: design and rationale. *Ann Epidemiol* 1, 263-276.
19. Psaty, B.M., Lee, M., Savage, P.J., Rutan, G.H., German, P.S., and Lyles, M. (1992). Assessing the use of medications in the elderly: methods and initial experience in the Cardiovascular Health Study. The Cardiovascular Health Study Collaborative Research Group. *J Clin Epidemiol* 45, 683-692.
20. Vaidya, D., Yanek, L.R., Moy, T.F., Pearson, T.A., Becker, L.C., and Becker, D.M. (2007). Incidence of coronary artery disease in siblings of patients with premature coronary artery disease: 10 years of follow-up. *Am J Cardiol* 100, 1410-1415.
21. Yanek, L.R., Moy, T.F., Blumenthal, R.S., Raqueno, J.V., Yook, R.M., Hill, M.N., Becker, L.C., and Becker, D.M. (1998). Hypertension among siblings of persons with premature coronary heart disease. *Hypertension* 32, 123-128.
22. Frohlich, E.D. (1988). Recommendations for blood pressure determination by sphygmomanometry. *Ann Intern Med* 109, 612.
23. Chobanian, A.V., Bakris, G.L., Black, H.R., Cushman, W.C., Green, L.A., Izzo, J.L., Jr., Jones, D.W., Materson, B.J., Oparil, S., Wright, J.T., Jr., et al. (2003). The Seventh Report of the Joint National Committee on Prevention, Detection, Evaluation, and Treatment of High Blood Pressure: the JNC 7 report. *Jama* 289, 2560-2572.
24. Province MA, Kardia SL, Ranade K, Rao DC, Thiel BA, Cooper RS, Risch N, Turner ST, Cox DR, Hunt SC, Weder AB, Boerwinkle E; National Heart, Lung and Blood Institute Family Blood Pressure Program. A meta-analysis of genome-wide linkage scans for hypertension: the National Heart, Lung and Blood Institute Family Blood Pressure Program. *Am J Hypertens*. 2003;16:144-7
25. Evans, M.K., Lepkowski, J.M., Powe, N.R., LaVeist, T., Kuczmarski, M.F., and Zonderman, A.B. (2010). Healthy aging in neighborhoods of diversity across the life span (HANDLS): overcoming barriers to implementing a longitudinal, epidemiologic, urban study of health, race, and socioeconomic status. *Ethn Dis* 20, 267-275.
26. Cesari, M., Penninx, B.W., Newman, A.B., Kritchevsky, S.B., Nicklas, B.J., Sutton-Tyrrell, K., Tracy, R.P., Rubin, S.M., Harris, T.B., and Pahor, M. (2003). Inflammatory markers and cardiovascular disease (The Health, Aging and Body Composition [Health ABC] Study). *Am J Cardiol* 92, 522-528.
27. Williams, R.R., Rao, D.C., Ellison, R.C., Arnett, D.K., Heiss, G., Oberman, A., Eckfeldt, J.H., Leppert, M.F., Province, M.A., Mockrin, S.C., et al. (2000). NHLBI family blood pressure program: methodology and recruitment in the HyperGEN network. Hypertension genetic epidemiology network. *Ann Epidemiol* 10, 389-400.
28. Cooper, R., Rotimi, C., Ataman, S., McGee, D., Osotimehin, B., Kadir, S., Muna, W., Kingue, S., Fraser, H., Forrester, T., et al. (1997). The prevalence of hypertension in seven populations of west African origin. *Am J Public Health* 87, 160-168.
29. Cooper, R., Puras, A., Tracy, J., Kaufman, J., Asuzu, M., Ordunez, P., Mufunda, J., and Sparks, H. (1997). Evaluation of an electronic blood pressure device for epidemiological studies. *Blood Press Monit* 2, 35-40.
30. Rotimi, C.N., Dunston, G.M., Berg, K., Akinsete, O., Amoah, A., Owusu, S., Acheampong, J., Boateng, K., Oli, J., Okafor, G., et al. (2001). In search of susceptibility genes for type 2 diabetes in West Africa: the design and results of the first phase of the AADM study. *Ann Epidemiol* 11, 51-58.
31. Tayo, B.O., Teil, M., Tong, L., Qin, H., Khitrov, G., Zhang, W., Song, Q., Gottesman, O., Zhu, X., Pereira, A.C., et al. (2011). Genetic background of patients from a university medical center in Manhattan: implications for personalized medicine. *PLoS One* 6, e19166.
32. Howard, V.J., Woolson, R.F., Egan, B.M., Nicholas, J.S., Adams, R.J., Howard, G., and Lackland, D.T. (2010). Prevalence of hypertension by duration and age at exposure to the stroke belt. *J Am Soc Hypertens* 4, 32-41.
33. Hays, J., Hunt, J.R., Hubbell, F.A., Anderson, G.L., Limacher, M., Allen, C., and Rossouw, J.E. (2003). The Women's Health Initiative recruitment methods and results. *Ann Epidemiol* 13, S18-77.



34. Hsia, J., Margolis, K.L., Eaton, C.B., Wenger, N.K., Allison, M., Wu, L., LaCroix, A.Z., and Black, H.R. (2007). Prehypertension and cardiovascular disease risk in the Women's Health Initiative. *Circulation* 115, 855-860.
35. Adeyemo, A., Gerry, N., Chen, G., Herbert, A., Doumatey, A., Huang, H., Zhou, J., Lashley, K., Chen, Y., Christman, M., et al. (2009). A genome-wide association study of hypertension and blood pressure in African Americans. *PLoS Genet* 5, e1000564.
36. Bochud, M., Elston, R.C., Maillard, M., Bovet, P., Schild, L., Shamlaye, C., and Burnier, M. (2005). Heritability of renal function in hypertensive families of African descent in the Seychelles (Indian Ocean). *Kidney Int* 67, 61-69.
37. Bochud, M., Bovet, P., Elston, R.C., Paccaud, F., Falconnet, C., Maillard, M., Shamlaye, C., and Burnier, M. (2005). High heritability of ambulatory blood pressure in families of East African descent. *Hypertension* 45, 445-450.
38. Bovet, P., J. W., Viswanathan, B., Madeleine, G., Romain, S., Yerly, P., Paccaud, F., and Gabriel, A. (2007). The Seychelles Heart Study 2004: methods and main findings. In. (Victoria, Seychelles, Ministry of Health and Social Development.
39. Bovet, P., Shamlaye, C., Gabriel, A., Riesen, W., and Paccaud, F. (2006). Prevalence of cardiovascular risk factors in a middle-income country and estimated cost of a treatment strategy. *BMC Public Health* 6, 9.
40. Ridker, P.M., Danielson, E., Fonseca, F.A., Genest, J., Gotto, A.M., Jr., Kastelein, J.J., Koenig, W., Libby, P., Lorenzatti, A.J., MacFadyen, J.G., et al. (2008). Rosuvastatin to prevent vascular events in men and women with elevated C-reactive protein. *N Engl J Med* 359, 2195-2207.
41. Chasman, D.I., Giulianini, F., MacFadyen, J., Barratt, B.J., Nyberg, F., and Ridker, P.M. (2012). Genetic determinants of statin-induced low-density lipoprotein cholesterol reduction: the Justification for the Use of Statins in Prevention: an Intervention Trial Evaluating Rosuvastatin (JUPITER) trial. *Circ Cardiovasc Genet* 5, 257-264.
42. Purcell, S., Neale, B., Todd-Brown, K., Thomas, L., Ferreira, M.A., Bender, D., Maller, J., Sklar, P., de Bakker, P.I., Daly, M.J., et al. (2007). PLINK: a tool set for whole-genome association and population-based linkage analyses. *American journal of human genetics* 81, 559-575.
43. Price, A.L., Patterson, N.J., Plenge, R.M., Weinblatt, M.E., Shadick, N.A., and Reich, D. (2006). Principal components analysis corrects for stratification in genome-wide association studies. *Nature genetics* 38, 904-909.
44. Kato, N., Takeuchi, F., Tabara, Y., Kelly, T.N., Go, M.J., Sim, X., Tay, W.T., Chen, C.H., Zhang, Y., Yamamoto, K., et al. (2011). Meta-analysis of genome-wide association studies identifies common variants associated with blood pressure variation in east Asians. *Nat Genet* 43, 531-538.
